# Supplementary material for: TIM-3, LAG-3, or 2B4 gene disruptions increase the anti-tumor response of engineered T cells
Source: PubMed Central journal article supplement (PMC10953820; doi:10.3389/fimmu.2024.1315283), 2024-02-29

# Supplementary Figure 1

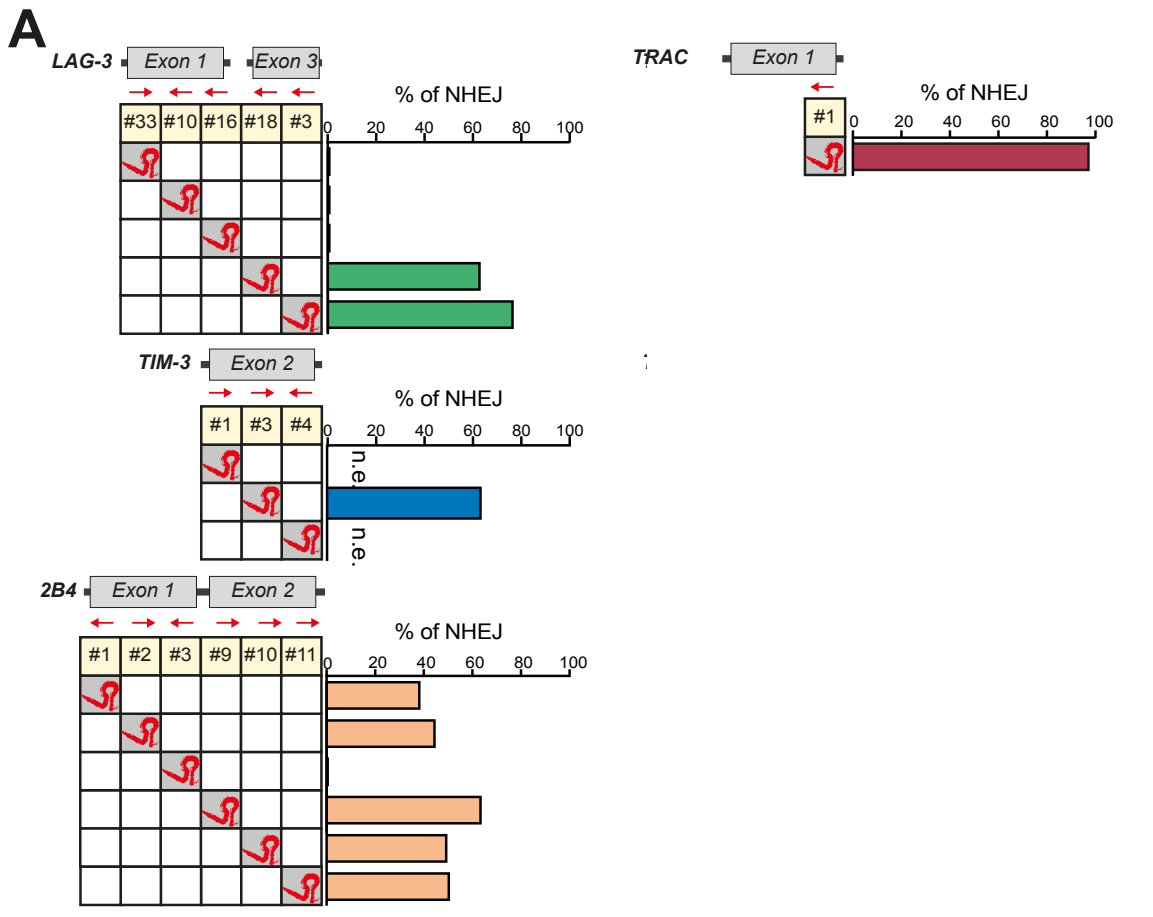

**B**

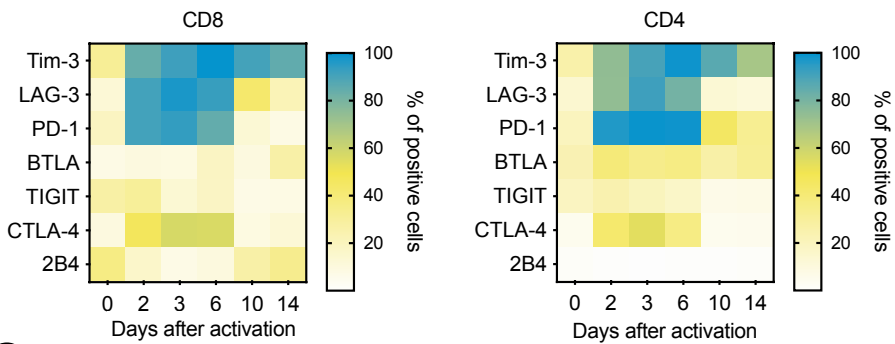

**C**

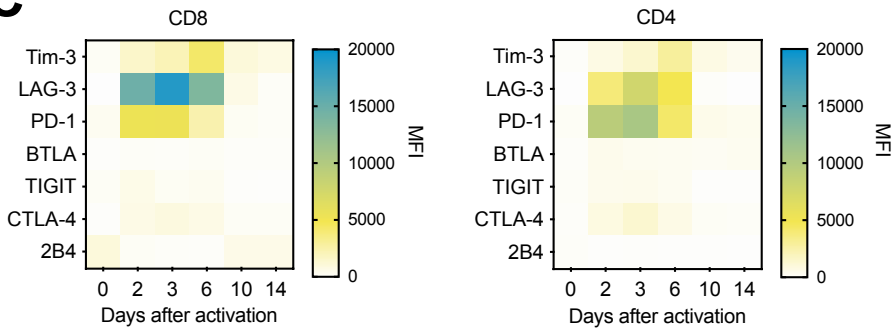

# Supplementary Figure 2

## A

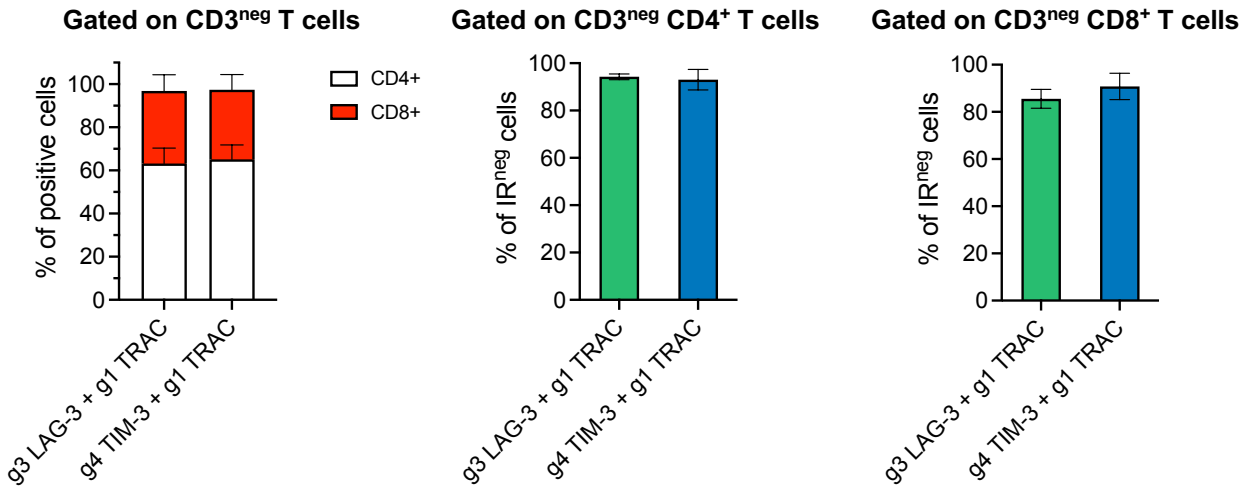

## B

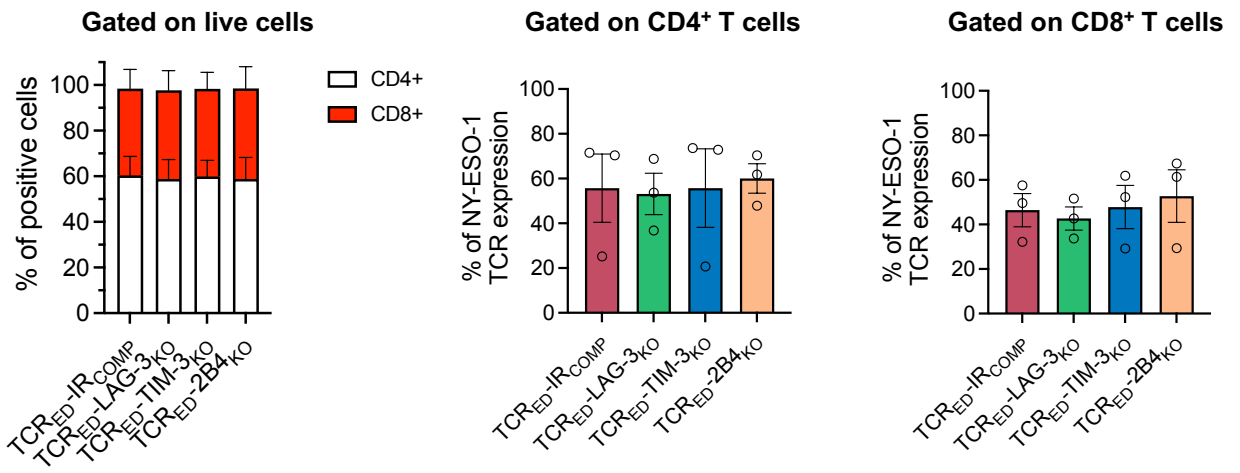

## C

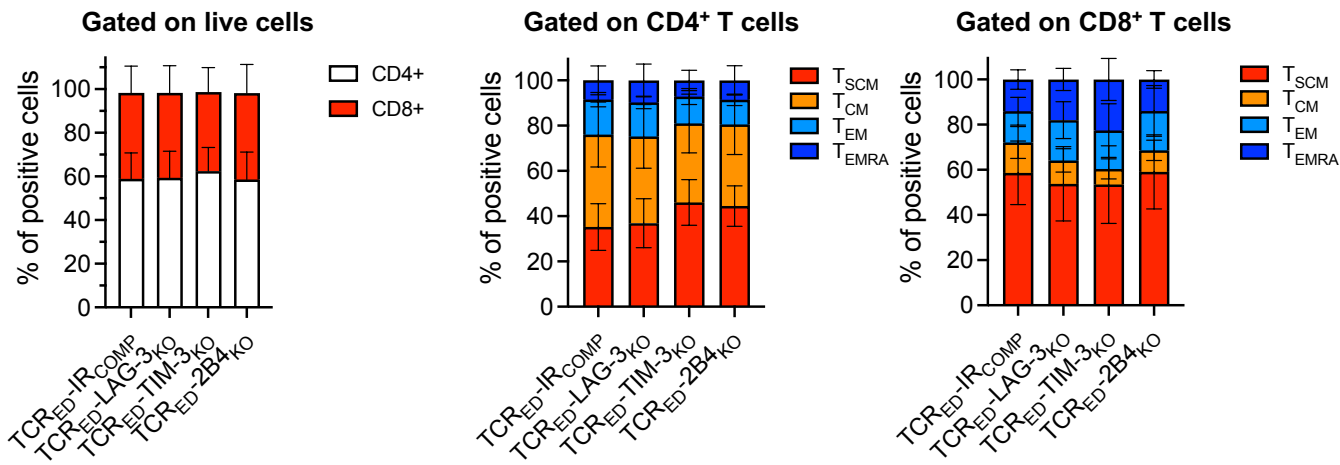

**D**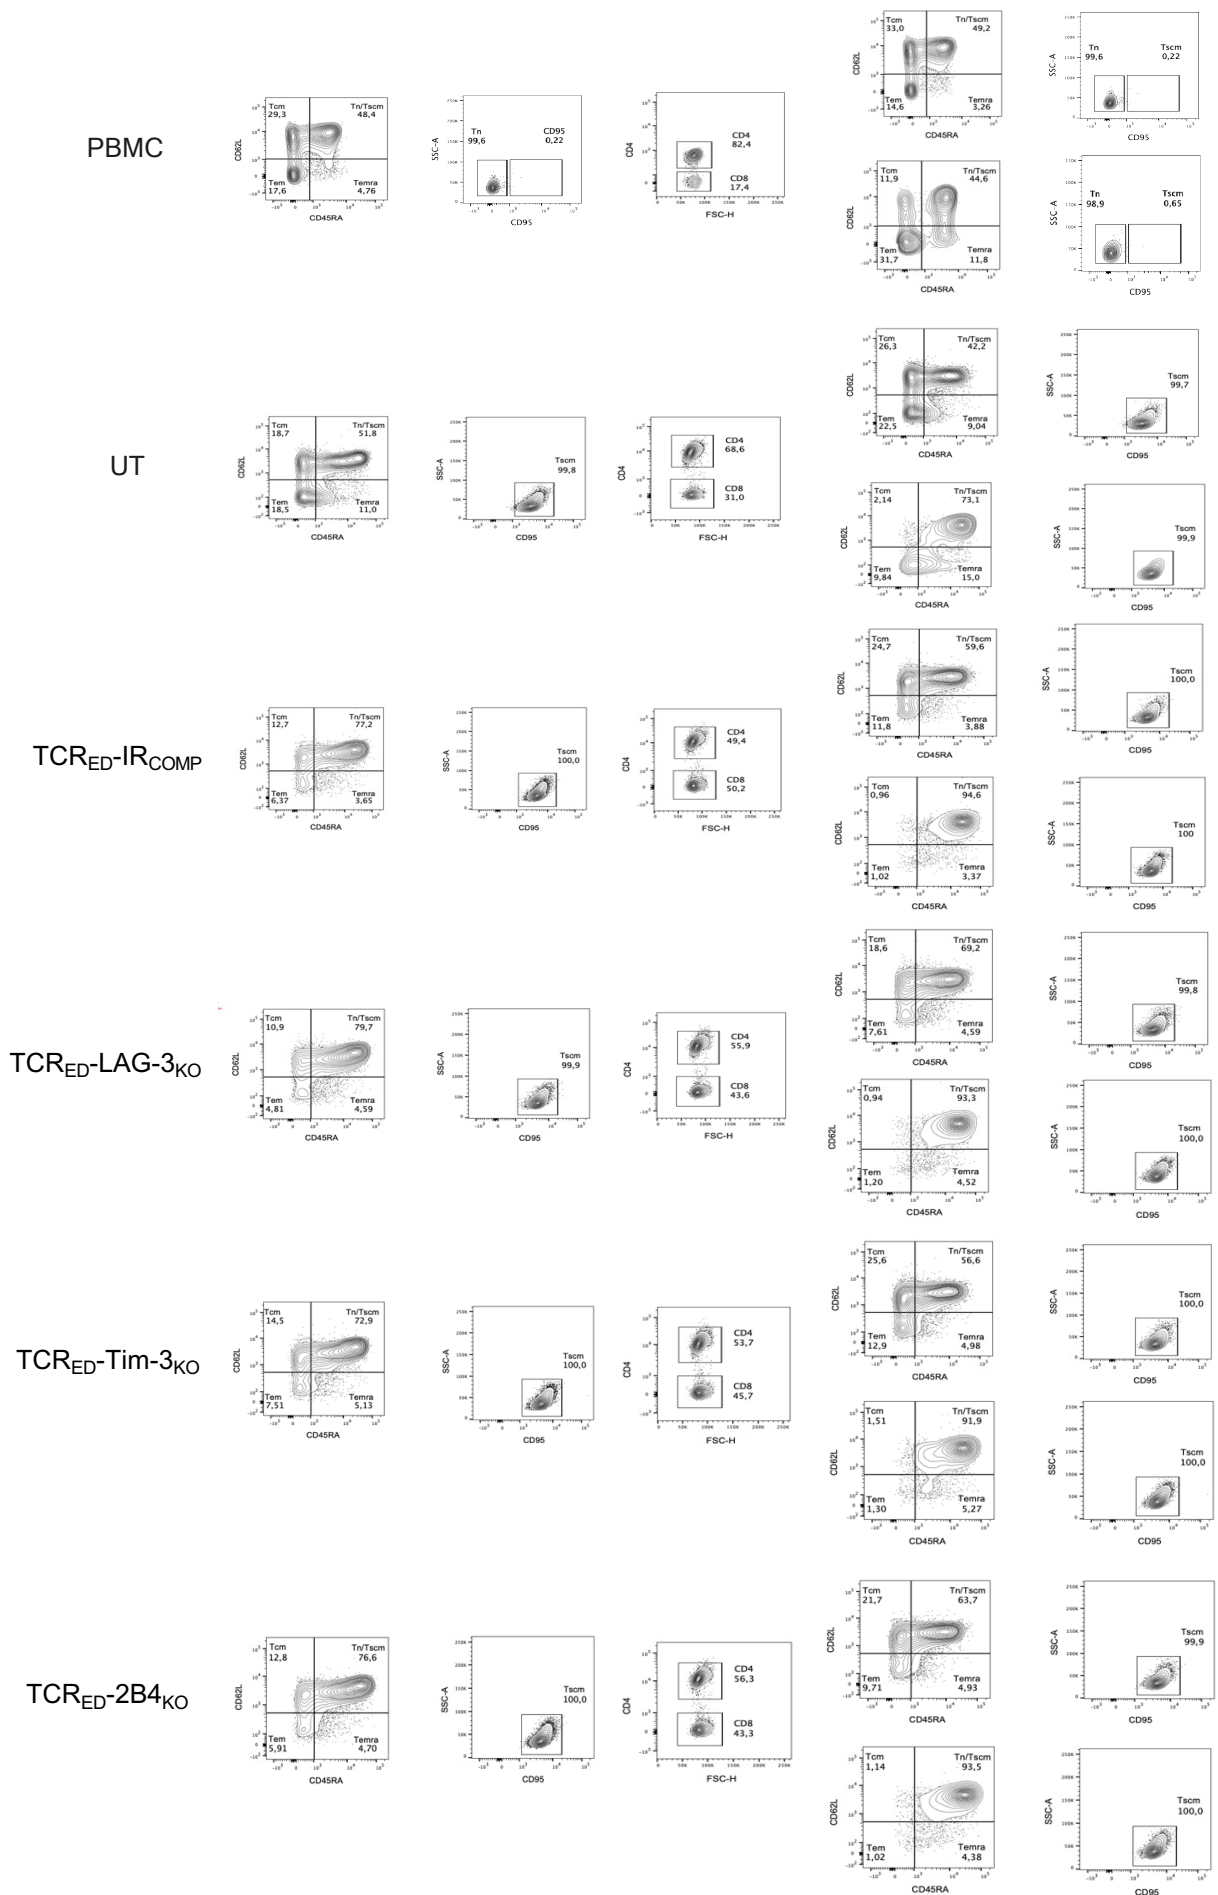

# Supplementary Figure 3

## A TIM-3 ligands

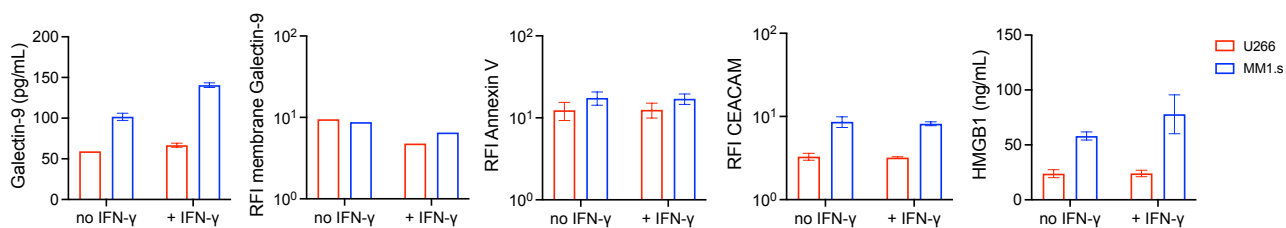

## 2B4 ligand

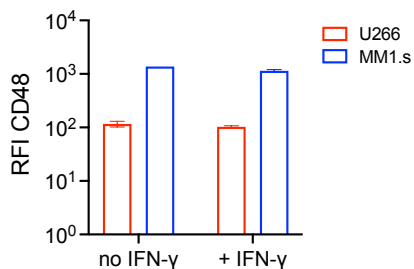

## LAG-3 ligands

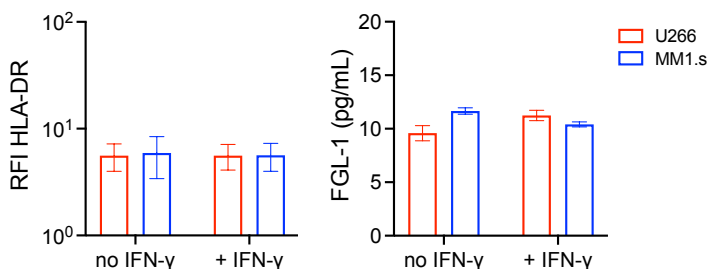

## B

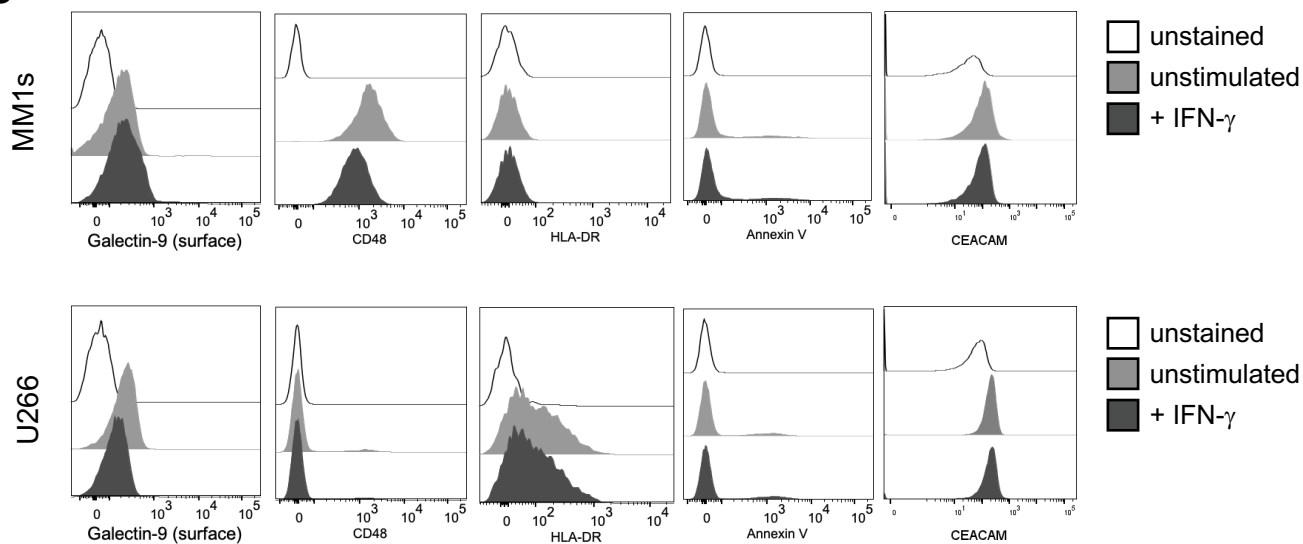

## C

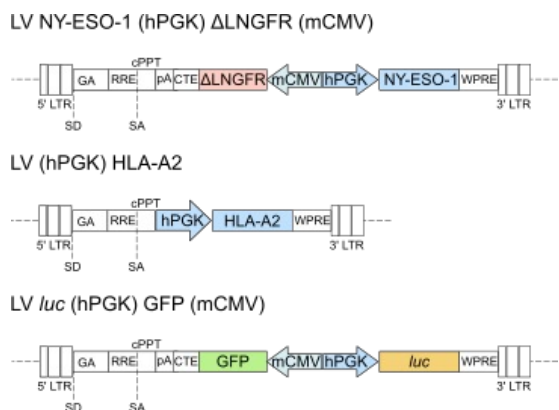

## D

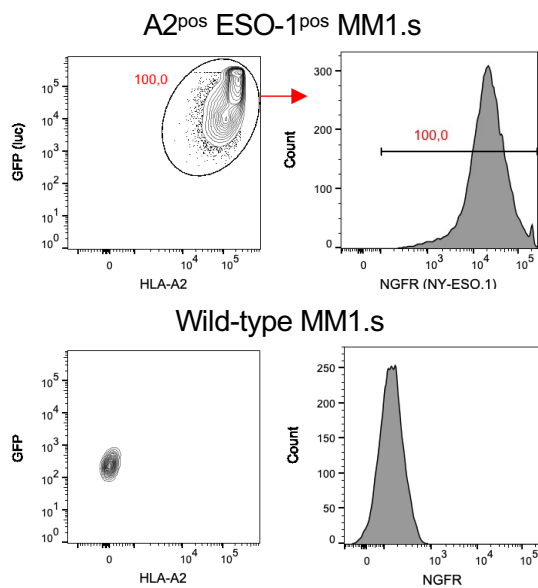

# Supplementary Figure 4

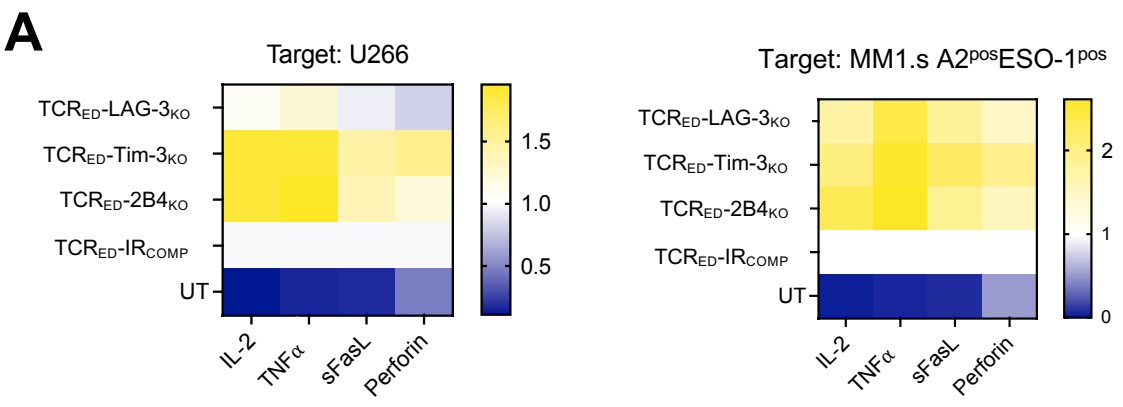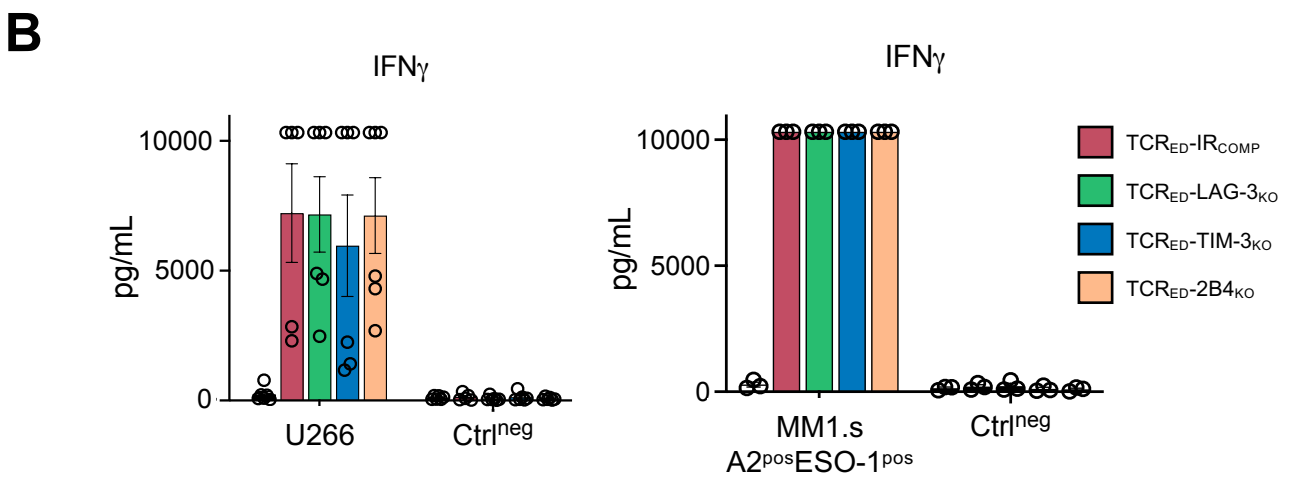

# Supplementary Figure 5

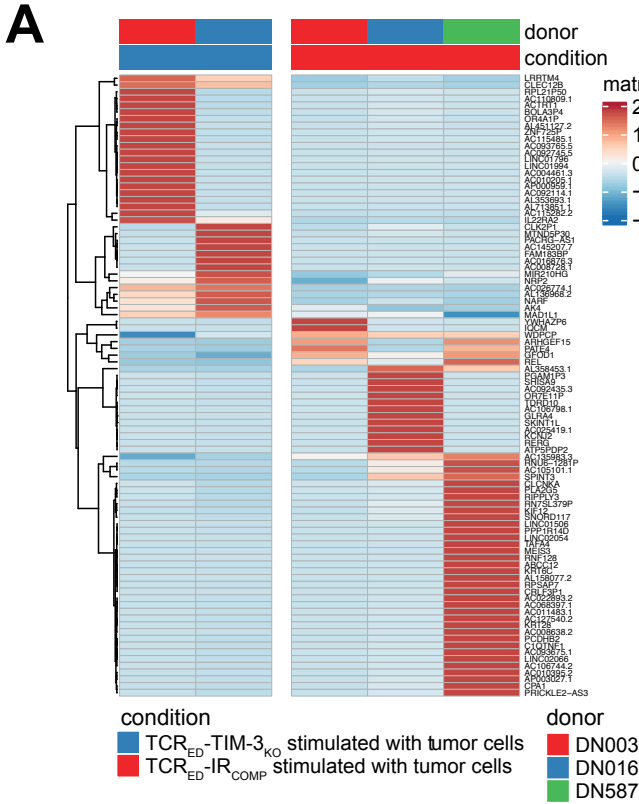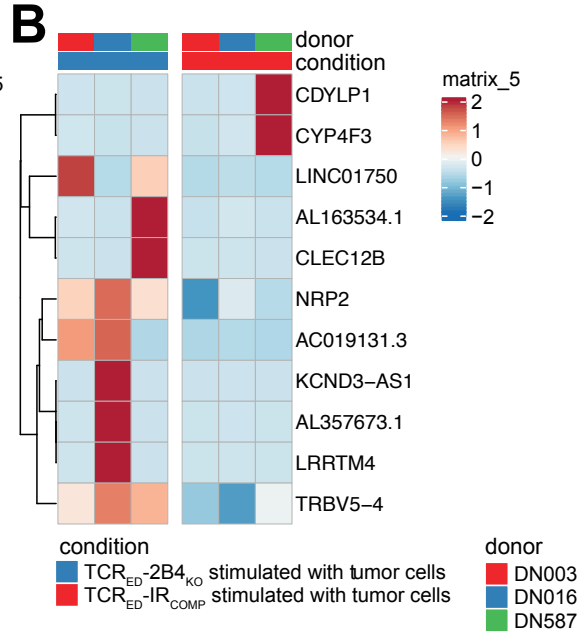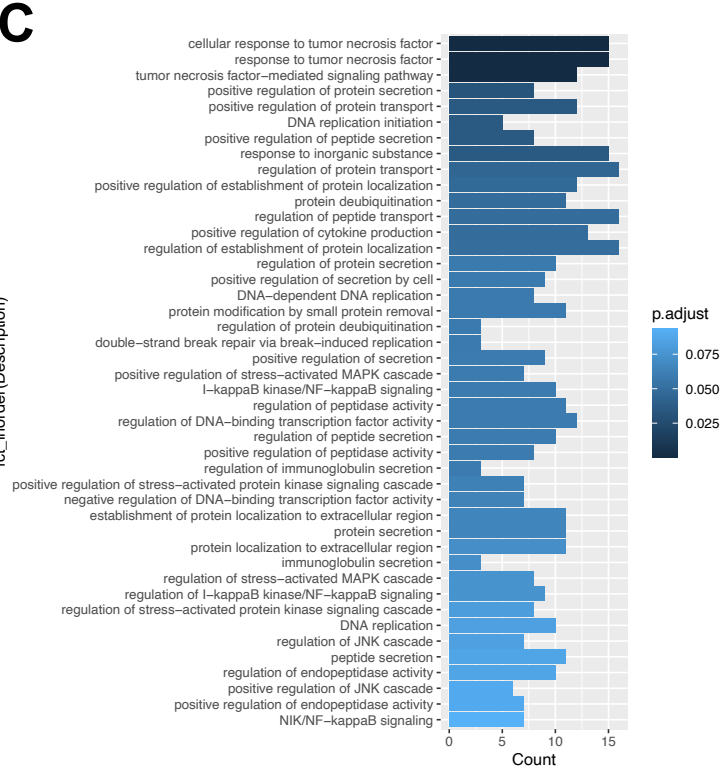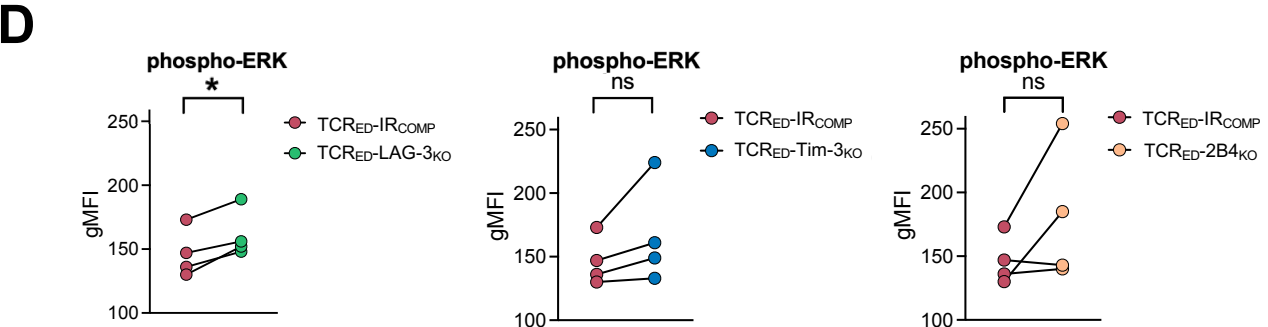

# Supplementary Figure 6

## IL2

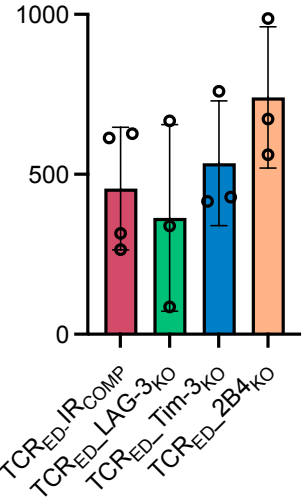

## TNF $\alpha$

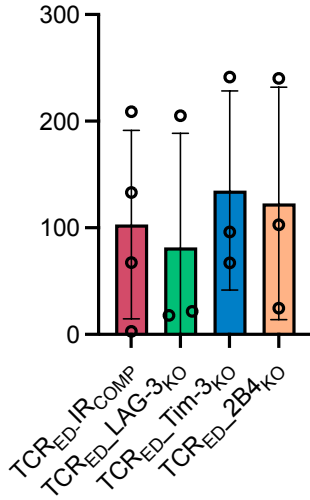

## Perforin

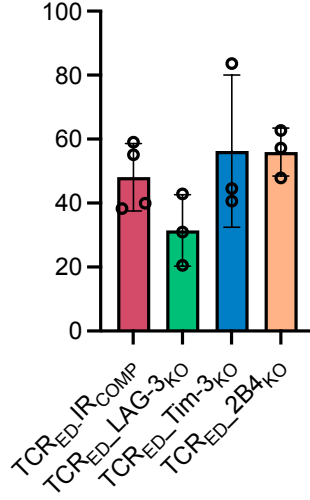

## sFasL

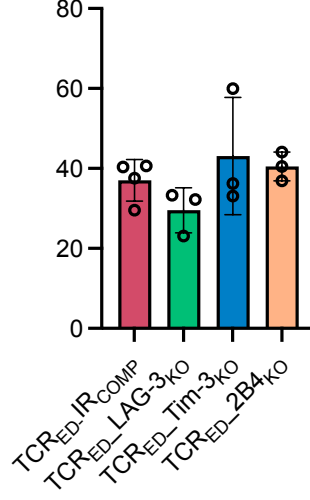

# Supplementary Figure 7

## A

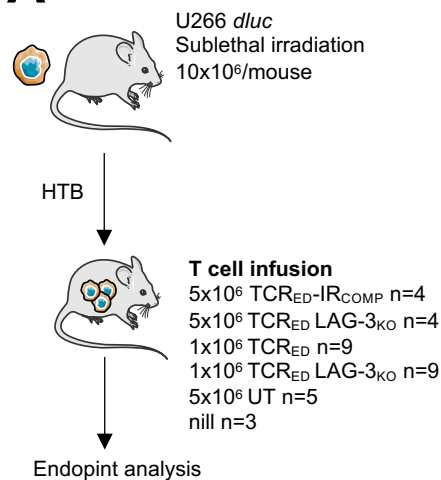

## B

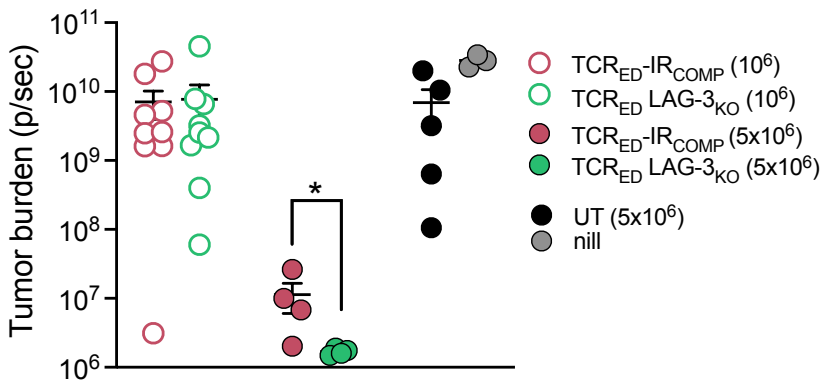

## C

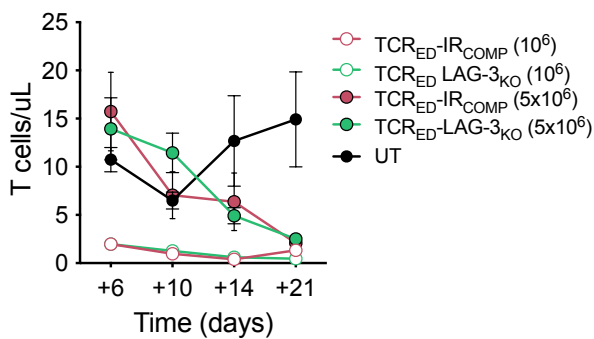

## D

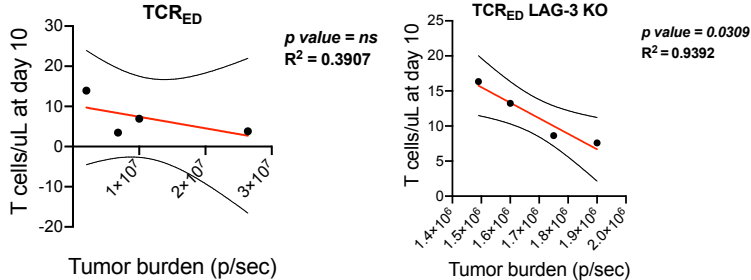

## E

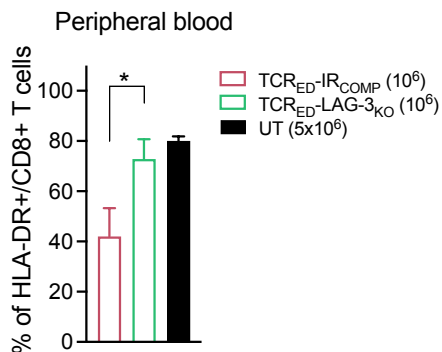

## F

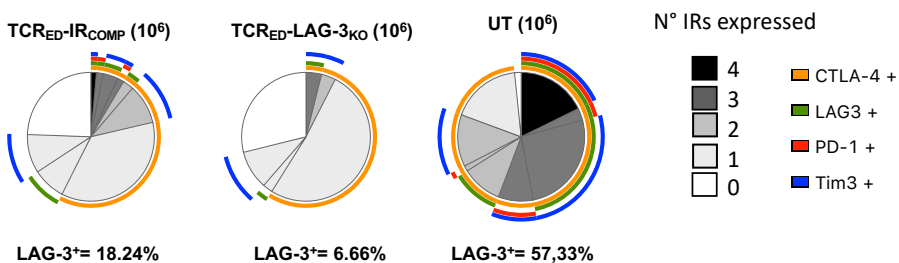



# Supplementary Figure 8

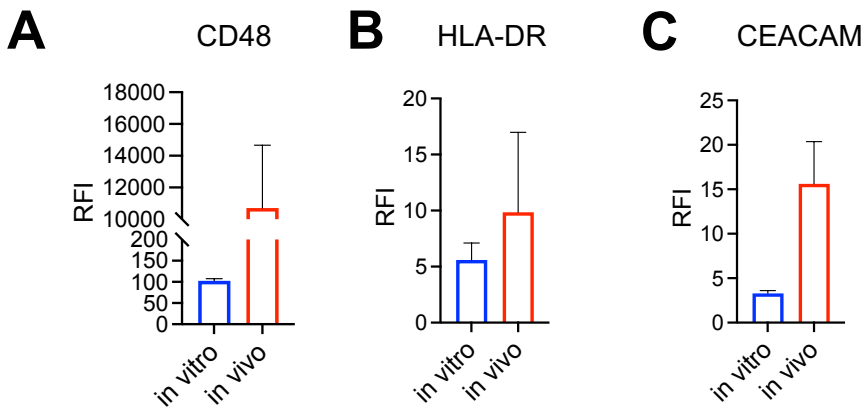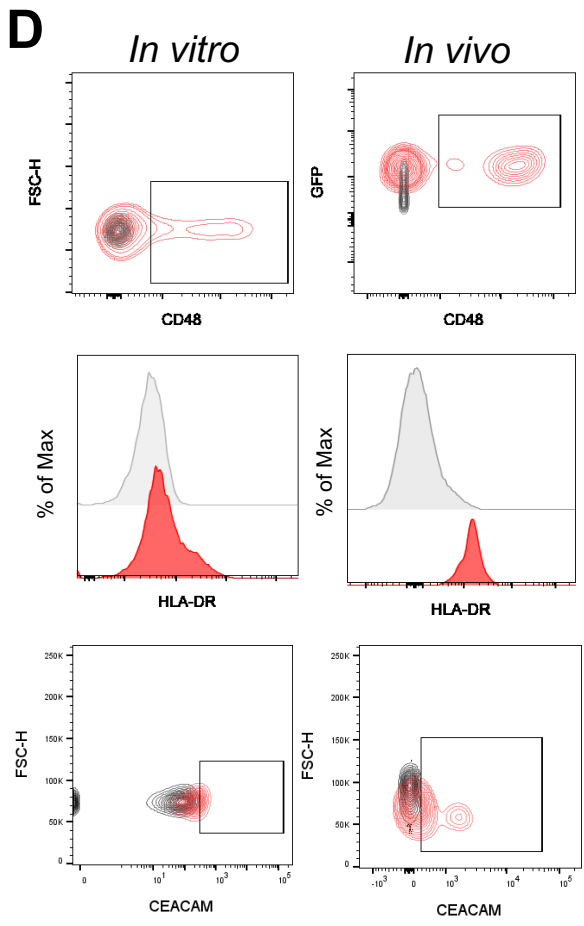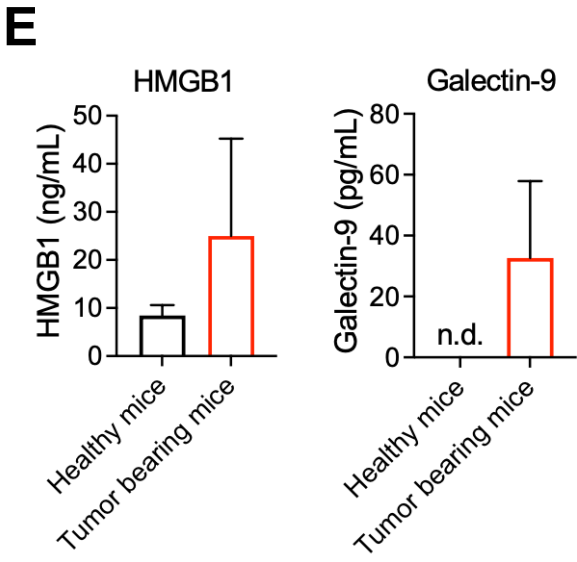

# Supplementary Figure 9

**A**

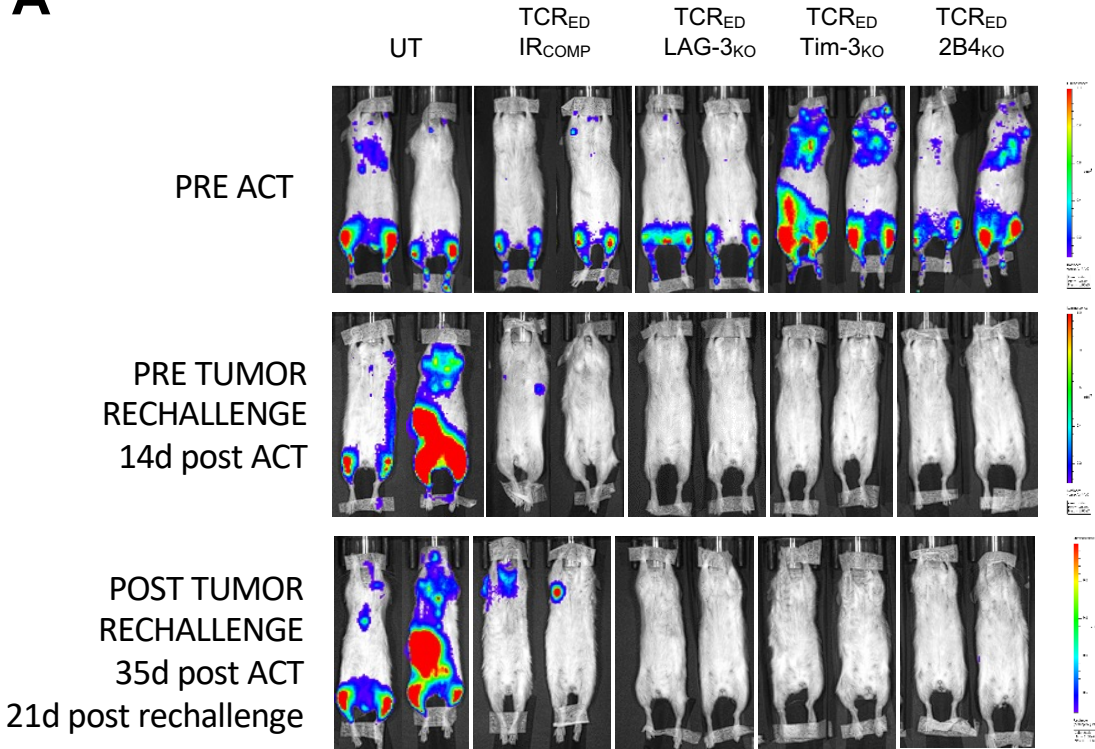

**B**

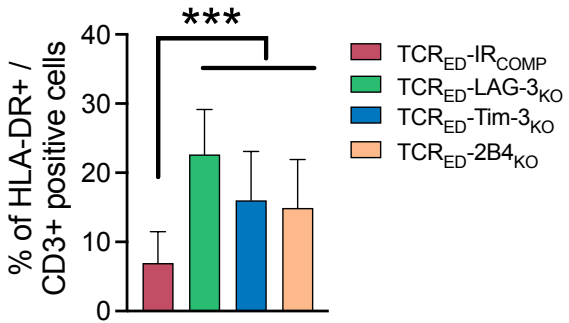

**C**

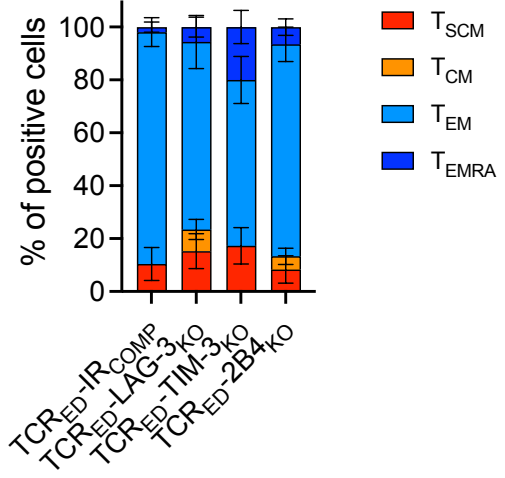

Supplement: DataSheet_2.pdf [file DataSheet_2.pdf]
