# Supplementary material for: TIM-3, LAG-3, or 2B4 gene disruptions increase the anti-tumor response of engineered T cells
Source: PubMed Central journal article supplement (PMC10953820; doi:10.3389/fimmu.2024.1315283), 2024-02-29
Supplement: DataSheet_1.pdf [file DataSheet_1.pdf]

## *Supplementary Material*

# **TIM-3, LAG-3, or 2B4 gene disruptions increase the anti-tumor response of engineered T cells**

**Beatrice Claudia Cianciotti, Zulma Irene Magnani<sup>†</sup>, Alessia Ugolini<sup>†</sup>, Barbara Camisa, Ivan Merelli, Valentina Vavassori, Alessia Potenza, Antonio Imparato, Francesco Manfredi, Danilo Abbati, Laura Perani, Antonello Spinelli, Eric Shifrut<sup>6</sup> Fabio Ciceri, Luca Vago, Raffaella Di Micco, Luigi Naldini, Pietro Genovese, Eliana Ruggiero<sup>‡\*</sup> and Chiara Bonini<sup>\*‡</sup>.**

**<sup>†</sup>these authors contributed equally to this work; <sup>‡</sup> these authors contributed equally to this**

**\* Correspondence:** bonini.chiara@hsr.it, [ruggiero.eliana@hsr.it](mailto:ruggiero.eliana@hsr.it)

Table 1: List monoclonal antibodies

| Specificity | Antibody        | Color           | Clone    | Catalogue  | Source          | Experiment |
|-------------|-----------------|-----------------|----------|------------|-----------------|------------|
| anti Human  | 2B4 (CD244)     | PE-dazzle       | C1,7     | 329522     | BioLegend       | C/E/I      |
| anti Human  | 7AAD            |                 |          | 420404     | BioLegend       | E/L        |
| anti Human  | Annexin V       | Alexa fluor 647 |          | 640912     | BioLegend       | L          |
| anti Human  | CD107a (LAMP-1) | PE eFluor610    | eBioH4A3 | 61-1079-42 | Invitrogen      | C/E        |
| anti Human  | CD138           | PE              | DL-101   | 352306     | BioLegend       | I          |
| anti Human  | CD138           | PE/Cy5          | B-A38    | A54191     | Beckman Coulter | L          |
| anti Human  | CD160           | PE/Cy7          | BY55     | 341212     | BioLegend       | E          |
| anti Human  | CD25            | APC/Cy7         | BC96     | 302614     | BioLegend       | C/E        |
| anti Human  | CD3             | BV510           | OKT3     | 317332     | BioLegend       | C/E/I      |
| anti Human  | CD3             | FITC            | SK7      | 11-0036-42 | Invitrogen      | C/E        |
| anti Human  | CD3             | PE/Cy7          | OKT3     | 25-0037-42 | Invitrogen      | C/E        |
| anti Human  | CD3             | BUV661          | SK7      | 741692     | BD Biosciences  | C/E        |
| anti Human  | CD3             | PerCP           | UCHT1    | MA1-10181  | Invitrogen      | P          |
| anti Human  | CD38            | PE/Cy7          | HB-7     | 356608     | BioLegend       | I/L        |
| anti Human  | CD39            | BUV737          | TU66     | 58781      | BD Biosciences  | E          |
| anti Human  | CD4             | APC/Cy7         | OKT4     | 317418     | BioLegend       | C/E        |
| anti Human  | CD4             | APC             | OKT4     | 17-0048-42 | Invitrogen      | C/E        |
| anti Human  | CD4             | PE/Cy7          | OKT4     | 25-0048-42 | Invitrogen      | E          |

|            |                      |              |         |             |                |       |
|------------|----------------------|--------------|---------|-------------|----------------|-------|
| anti Human | CD40L (CD154)        | PE           | TRAP1   | 555700      | BD Biosciences | C/E   |
| anti Human | CD45RA               | BUV496       | H100    | 750258      | BD Biosciences | C/E   |
| anti Human | CD45RA               | PE           | H100    | 12-0458-42  | Invitrogen     | E     |
| anti Human | CD48                 | APC Vio770   | REA426  | 130-106-470 | Miltenyi       | I/L   |
| anti Human | CD62L                | BUV737       | DREG-56 | 741843      | BD Biosciences | C/E   |
| anti Human | CD62L                | Pacific Blue | DREG-56 | 304826      | BioLegend      | E     |
| anti Human | CEACAM (CD66a/c/e)   | PE           | ASL-32  | 342304      | BioLegend      | L     |
| anti Human | CD69                 | APC          | FN50    | 310910      | BioLegend      | C/E   |
| anti Human | CD8                  | BV785        | SK1     | 344740      | BioLegend      | C/E   |
| anti Human | CD8                  | PerCP        | SK1     | 345774      | BD             | C/E   |
| anti Human | CD8                  | APC/Cy7      | SK1     | 344714      | BioLegend      | C/E   |
| anti Human | CD8                  | BUV395       | RPA-T8  | 9240259     | BD Biosciences | E     |
| anti Human | CD80                 | PE/Cy7       | 2D10    | 305218      | BioLegend      | I     |
| anti Human | CD95 (FAS)           | FITC         | DX2     | 305606      | BioLegend      | E     |
| anti Human | CTLA-4 (CD152)       | BV605        | BNI3    | 369610      | BioLegend      | C/E/I |
| anti Human | DAPI                 |              |         | D9542       | Sigma-aldrich  | C/E/I |
| anti Human | ERK1/2 (pT202/pY204) |              | 20A     | 562981      | BD Biosciences | P     |
| anti Human | Galectin-9           | APC          | 9M1-3   | 348908      | BioLegend      | L     |
| anti Human | hCD45                | APC/Cy7      | H130    | 304014      | BioLegend      | I     |
| anti Human | HLA-A2               | PE           | BB7.2   | 12-9876-42  | Invitrogen     | I     |
| anti Human | HLA-A2               | APC          | BB7.2   | 343308      | BioLegend      | L     |
| anti Human | HLA-DR               | BV480        | G46-6   | 566113      | BD Biosciences | C/E/I |
| anti Human | HLA-DR               | PE           | L243    | 307606      | BioLegend      | C/E   |
| anti Human | HLA-DR               | APC/Cy7      | L243    | 307618      | BioLegend      | E     |

## Supplementary Material

|            |                |                 |           |             |                 |       |
|------------|----------------|-----------------|-----------|-------------|-----------------|-------|
| anti Human | IFN $\gamma$   | APC/Cy7         | 4S.B3     | 502530      | BioLegend       | C/E   |
| anti Human | IL2            | APC             | MQ1-17H12 | 500310      | BioLegend       | C/E   |
| anti Human | Ki-67          | Alexa fluor 488 | Ki-67     | 350508      | BioLegend       | C/E   |
| anti Human | KLRG1 (MAFA)   | BV785           | 2F1/KLRG1 | 138429      | BioLegend       | E     |
| anti Human | LAG3 (CD223)   | APC             | REA351    | 130-119-567 | Miltenyi        | C/E/I |
| anti Mouse | mCD45          | PerCP           | 30-F11    | 103130      | BioLegend       | I     |
| anti Human | NGFR (CD271)   | APC             | ME20.4    | 17-9400-42  | Invitrogen      | L     |
| anti Human | PD-1 (CD279)   | BV650           | EH12-2H7  | 329950      | BioLegend       | C/E/I |
| anti Human | PD-1 (CD279)   | PE/Cy7          | EH12.2H7  | 329918      | BioLegend       | C/E   |
| anti Human | PD-1 (CD279)   | APC             | EH12.2H7  | 329908      | BioLegend       | E     |
| anti Human | PD-1 (CD279)   | BV421           | EH12-2H7  | 329920      | BioLegend       | C/E   |
| anti Human | TIGIT          | PE/Cy7          | MBSA43    | 25-9500-42  | Invitrogen      | C/E   |
| anti Human | TIGIT          | BB700           | 741182    | 747846      | BD Biosciences  | E     |
| anti Human | TIM3 (CD3663)  | PE              | REA635    | 130-119-785 | Miltenyi        | C/E/I |
| anti Human | TNF $\alpha$   | PE/Cy7          | MAB11     | 502930      | BioLegend       | C/E   |
| anti Human | V $\beta$ 13.1 | FITC            |           | IM1554      | Beckman Coulter | E     |
|            | Zombie aqua    | BV510           |           | 423102      | BioLegend       | L     |
|            | Zombie violet  | Pacific blue    |           | 423114      | BioLegend       | C/E/I |

**Legend:** C= chronic; E= editing; I= in vivo; L= cell lines; P= phosphoFlow

## 2 Supplementary Figures

### Supplementary Figure 1

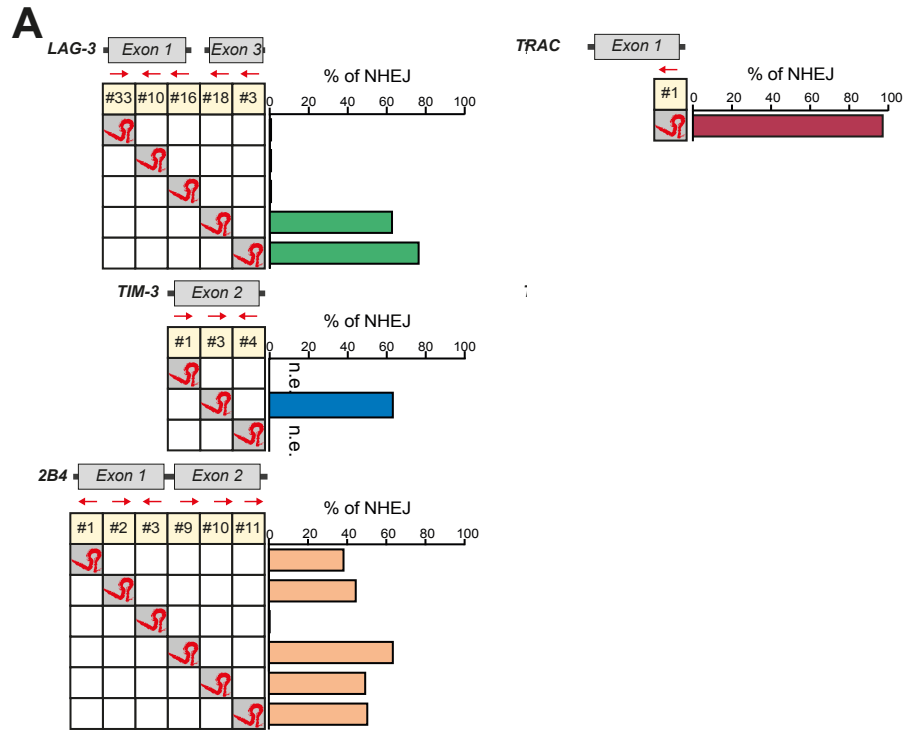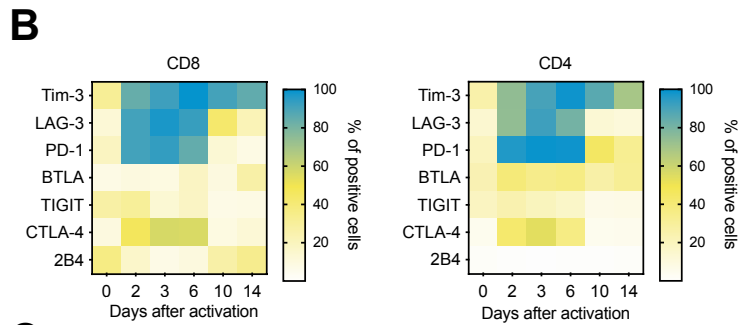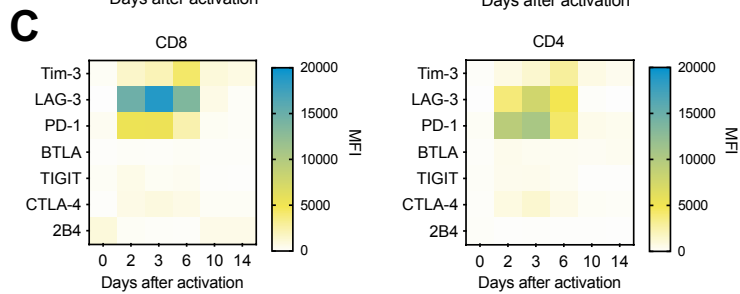

**Supplementary Figure 1. Design and screening of multiple gRNAs targeting the endogenous TCR or inhibitory genes.**

(A) Screening of gRNAs targeting the coding regions of *LAG-3*, *TIM-3*, *2B4*, and *TRAC* genes. For each gRNAs, the frequency of NHEJ events is shown. Each red arrow indicates a single gRNA and the direction of the arrows indicate the genomic orientation of the gRNA sequences. Heatmap showing the frequencies (B) and the mean fluorescence intensity-MFI (C) of IR<sup>+</sup> CD8<sup>+</sup> (left) and CD4<sup>+</sup> (right) T cells in resting conditions (day 0) and in the first 14 days after polyclonal stimulation. The percentage of positive cells and the MFI is indicated by a color gradient ranging from white (0%) to blue (100%), as indicated in the right panel. Data from a single healthy donor were used for gRNA screening (A). In panel B and C, data from 3 different biological replicates are shown (N=3).

## Supplementary Figure 2

**A**

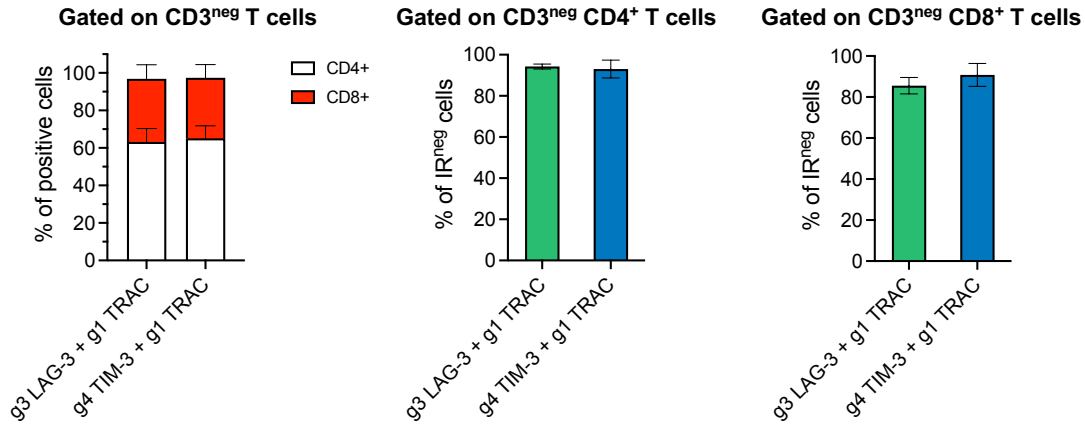

**B**

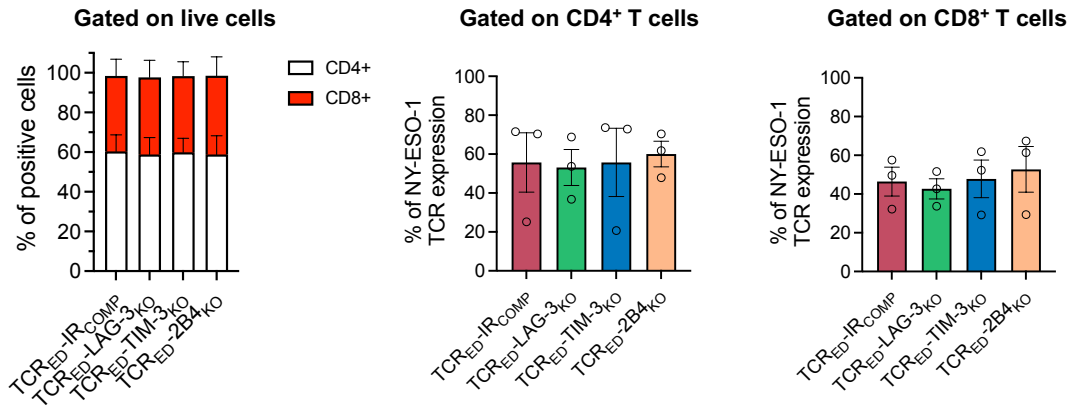

**C**

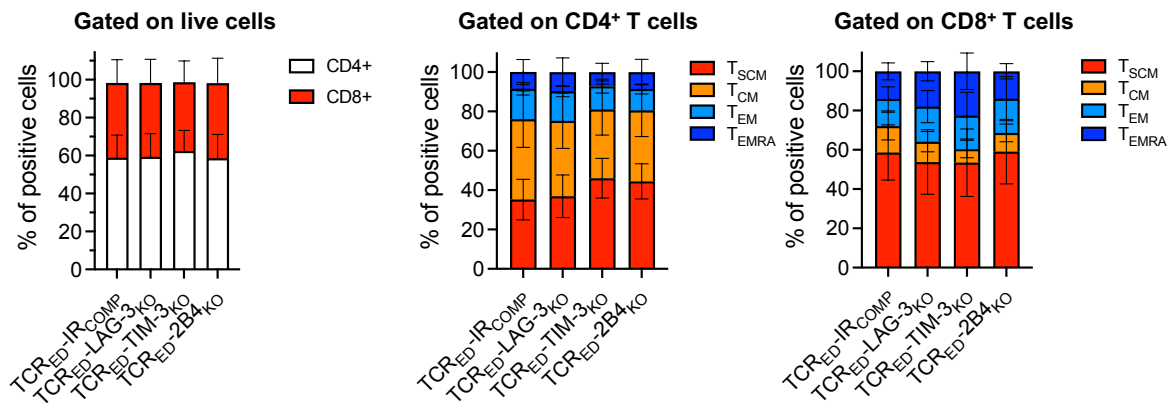

D

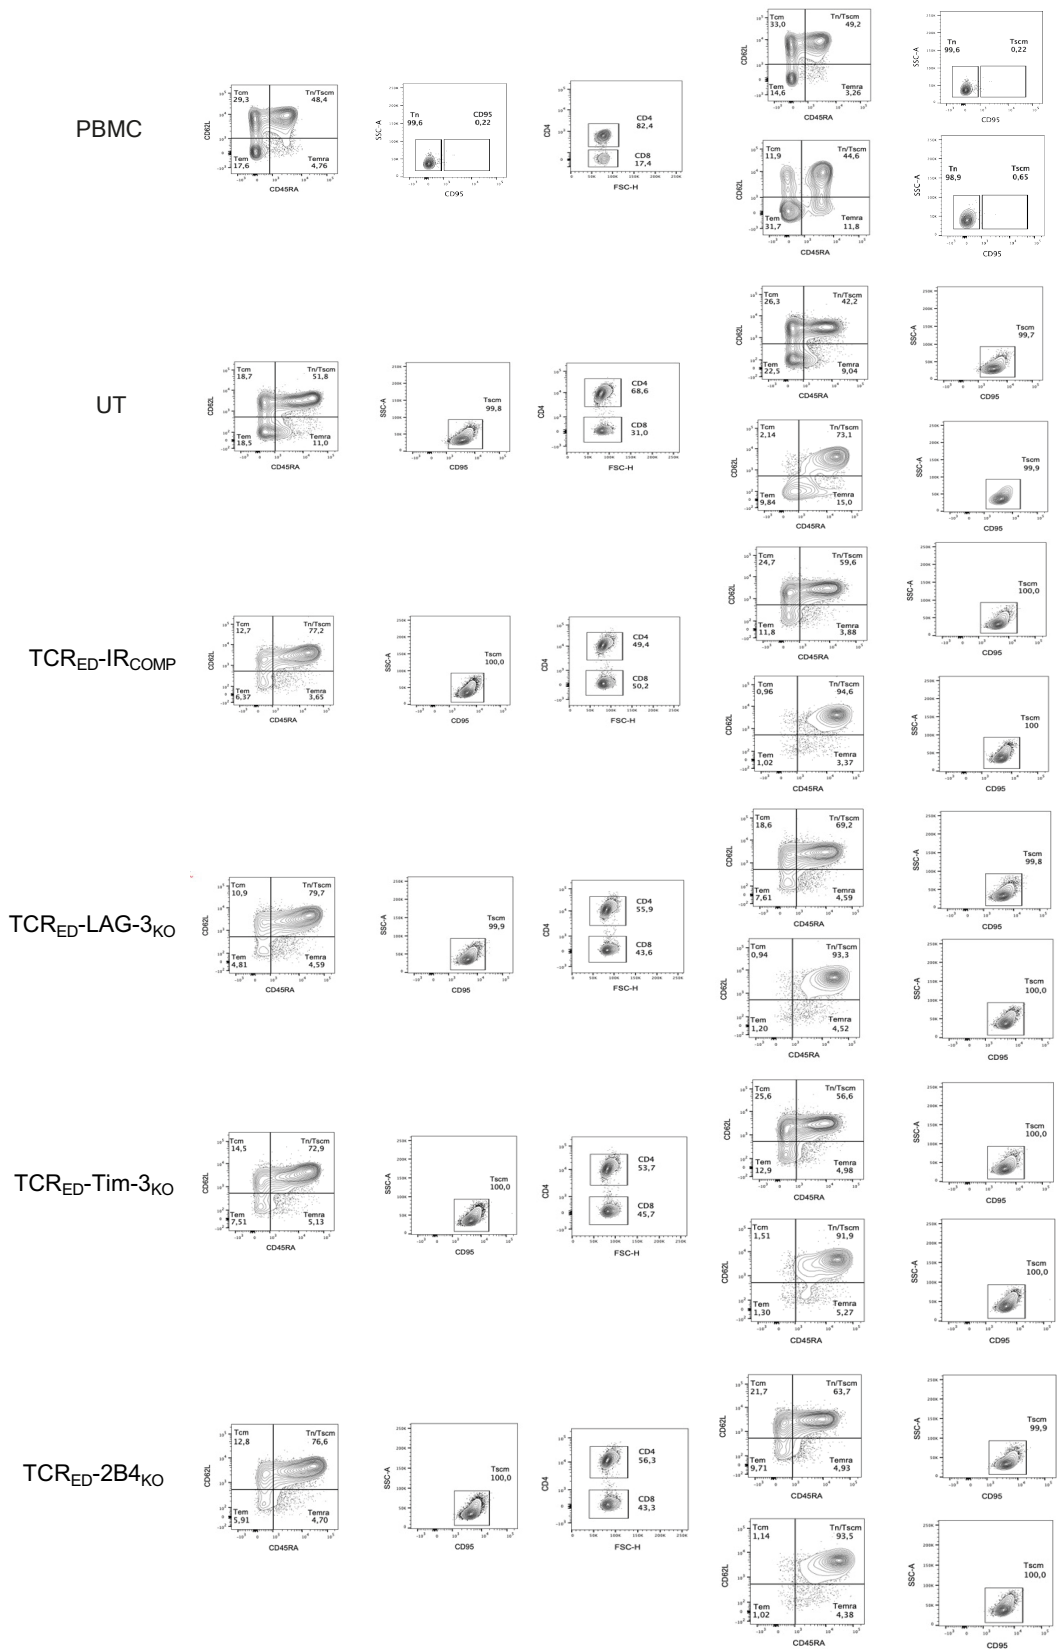



**Supplementary Figure 2. Gene modifications and memory compositions of CD4<sup>+</sup> and CD8<sup>+</sup> TCR<sub>ED</sub>-IR<sub>KO</sub> T cells.**

**(A)** Bar graphs showing the frequencies of CD4<sup>+</sup> and CD8<sup>+</sup> T cells (left panel), the frequencies of LAG3<sup>neg</sup> (green bars) and TIM-3<sup>neg</sup> (blue bars) CD4<sup>+</sup> and CD8<sup>+</sup> T cells (central and right panels, respectively) in CD3<sup>neg</sup> T cells 5 days after CRISPR/Cas9 delivery (day 7 of the manufacturing protocol) in the indicated cellular products (N=3). **(B)** Bar graphs showing the frequencies of CD4<sup>+</sup> and CD8<sup>+</sup> T cells (left panel) and the frequencies of CD4<sup>+</sup> and CD8<sup>+</sup> cells (central and right panels, respectively) expressing the NY-ESO-1-specific TCR at day 10 of the manufacturing protocol in the indicated cellular products (N=3). **(C)** Bar graphs showing the frequency of CD4<sup>+</sup> and CD8<sup>+</sup> T cells (N=3) and the memory phenotype of CD4<sup>+</sup> and CD8<sup>+</sup> T cells (N=4) (central and right panel, respectively) at the end of the manufacturing protocol (day 18) in all tested cellular products. Data are shown as mean ± SEM from 3-4 different biological replicates. **(D)** Representative dot plots depicting the frequencies of effector and memory CD3<sup>+</sup>, CD4<sup>+</sup>, CD8<sup>+</sup> T cell subsets in TCR<sub>ED</sub>-IR<sub>COMP</sub> and TCR<sub>ED</sub>-IR<sub>KO</sub> cells.

Supplementary Figure 3

**A**

TIM-3 ligands

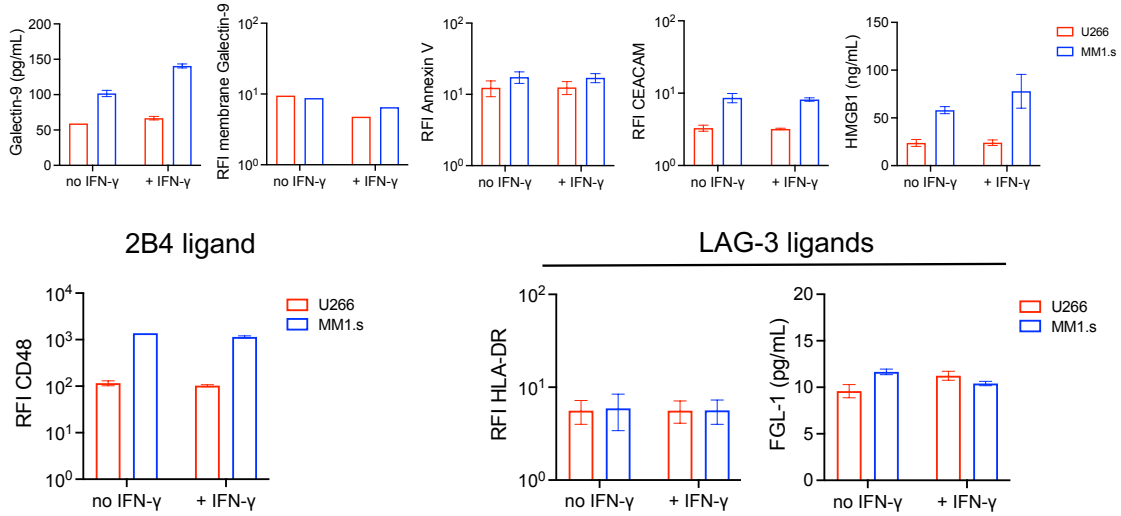

**B**

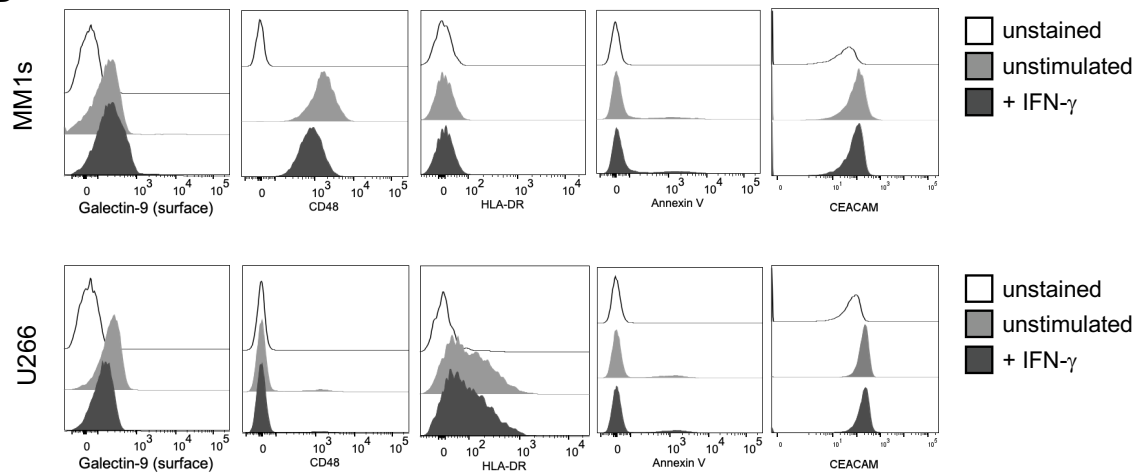

**C**

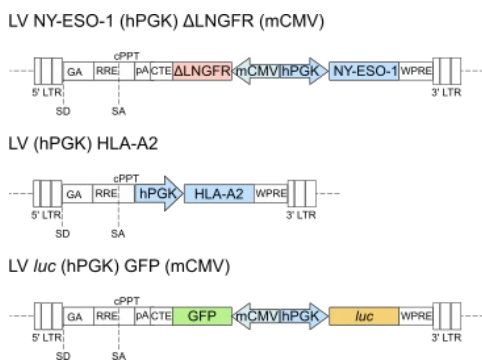

**D**

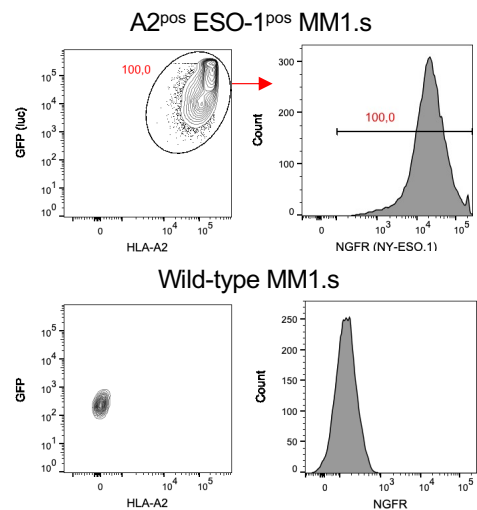

**Supplementary Figure 3. Generation and characterization of HLA-A2<sup>POS</sup> NY-ESO-1<sup>POS</sup> human tumor cell lines.**

**(A)** Quantification in U266 or MM1.s in resting conditions or upon 48 hours IFN $\gamma$  stimulation of soluble and membrane bound galectin-9 (N=2/3), Annexin V (N=6), CEACAM (N=3) and HMGB1 (N=2/3) (ligands of TIM-3; upper panels); CD48 (ligand of 2B4; bottom left; N=5) and HLA-DR (N=6) and FGL-1 (N=2/3) (ligands of LAG-3; bottom right). **(B)** Representative histograms showing membrane bound Galectin-9 (Galectin 9 – surface), CD48, HLA-DR, Annexin V and CEACAM expression in MM1.s and U266 unstimulated (light grey histograms) and 48h after IFN $\gamma$  stimulation (dark grey histograms). Unstained cells (white histograms) are shown as control. **(C)** Schematic representations of lentiviral vectors encoding for the NY-ESO-1 antigen under hPGK promoter and  $\Delta$ LNGFR selection marker under mCMV promoter [LV NY-ESO-1 (hPGK)  $\Delta$ LNGFR (mCMV), upper panel] or encoding for HLA-A2 under hPGK promoter [LV (hPGK) HLA-A2], middle panel] or encoding for the firefly luciferase under hPGK promoter and green fluorescent protein under mCMV promoter [LV luc (hPGK) GFP (mCMV), lower panel]. **(D)** Representative plots of MM1.s engineered to express luciferase, HLA-A2 and NY-ESO-1 (upper panel) or MM1.s wt cells (bottom panel). In panel A, mean  $\pm$  SEM from 2-6 technical replicates are shown, with the exception of membrane Galectin-9 (single replicate).

## Supplementary Figure 4

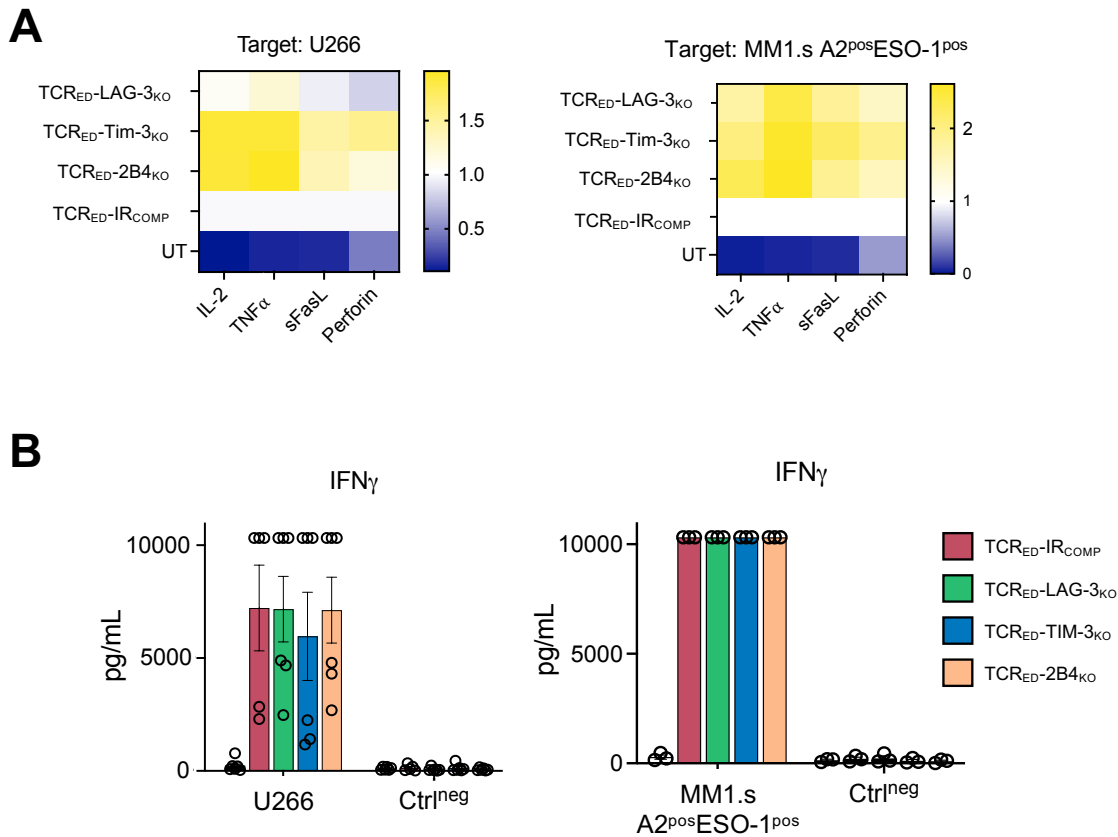

**Supplementary Figure 4. TCR<sub>ED</sub>-IR<sub>KO</sub> T cells produce higher amount of effector molecules than TCR<sub>ED</sub>-IR<sub>COMP</sub> T cells.**

(A) Heatmap showing the ratio of secreted effector molecules produced by TCR<sub>ED</sub>-IR<sub>KO</sub> over TCR<sub>ED</sub>-IR<sub>COMP</sub> cells upon 24 hours co-culture with U266 (left panel) or HLA-A2<sup>pos</sup>ESO-1<sup>pos</sup> MM1s target cells (right panel). Data are shown as mean  $\pm$  SEM of at least 3 biological replicates. (B) Quantification of IFN<sub>γ</sub> produced by TCR<sub>ED</sub>-IR<sub>COMP</sub> (red bars), TCR<sub>ED</sub>-LAG-3<sub>KO</sub> (green bars), TCR<sub>ED</sub>-TIM-3<sub>KO</sub> (blue bars), and TCR<sub>ED</sub>-2B4<sub>KO</sub> (light orange bars) T cells upon exposure to HLA-A2<sup>pos</sup> NY-ESO<sup>pos</sup> U266 cells (left panel; N=6) or MM1.s A2<sup>pos</sup> ESO-1<sup>pos</sup> cells (right panel; N=3). Negative controls (Ctrl<sup>neg</sup>) indicate exposure of effector cells to medium or wild-type MM1.s cells. Data are shown as mean  $\pm$  SEM of 3-6 biological replicates.

# Supplementary Figure 5

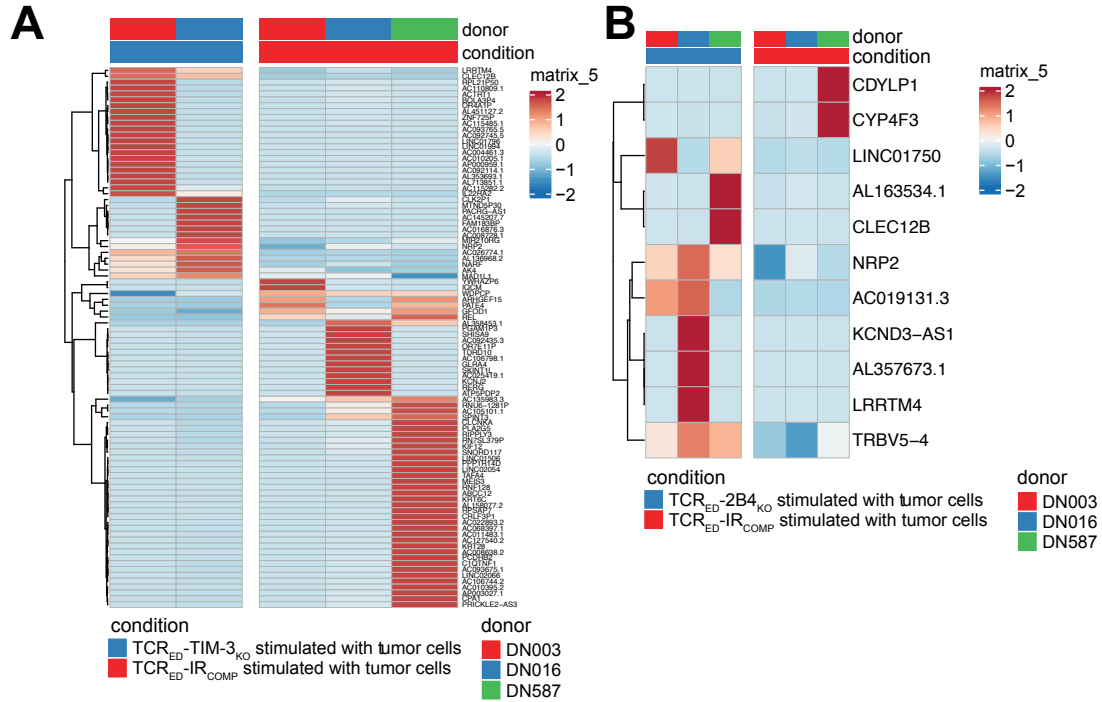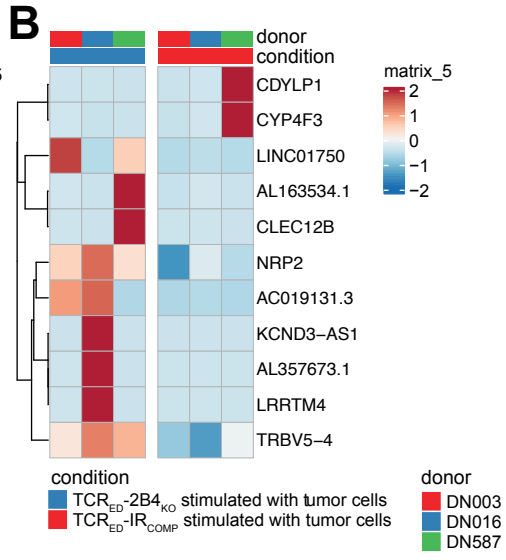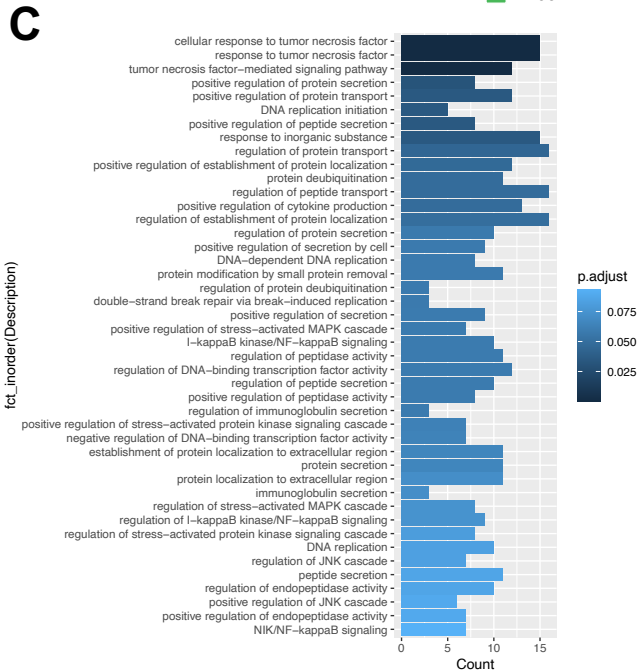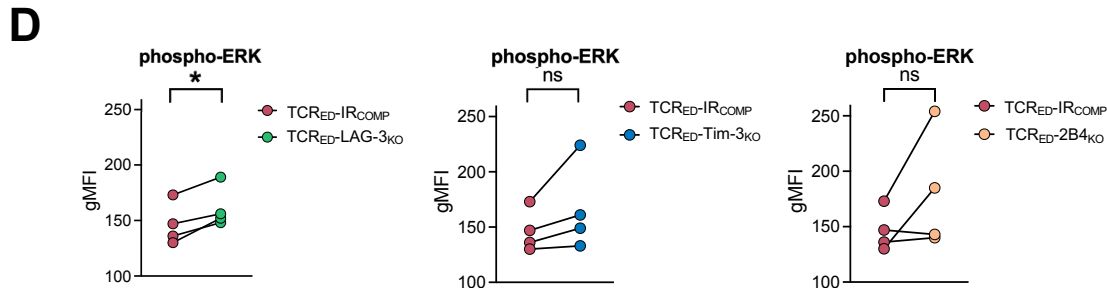

**Supplementary Figure 5. Gene expression analysis reveals specific transcriptomic changes in TCR<sub>ED</sub>-IR<sub>KO</sub> T cells.**

Vulcano plots showing differentially expressed genes (DEGs) in TCR<sub>ED</sub>-TIM-3<sub>KO</sub> (A) and TCR<sub>ED</sub>-2B4<sub>KO</sub> (B) T cells upon stimulation with MM1.s A2<sup>pos</sup> ESO-1<sup>pos</sup> cancer cells. (C) Gene ontology (biological process) of the 30 uniquely DEGs in TCR<sub>ED</sub>-2B4<sub>KO</sub> T cells upon stimulation with cancer cells. (D) Geometric mean fluorescence intensity (gMFI) of phospho-ERK measured by flow cytometry on TCR<sub>ED</sub>-IR<sub>KO</sub> and TCR<sub>ED</sub>-IR<sub>COMP</sub> cells 8 minutes after TCR triggering. Data obtained from 3 (panels A-C) and 4 (panel D) biological replicates are shown. \*: p value <0.05; two-tailed paired t-test.

## Supplementary Figure 6

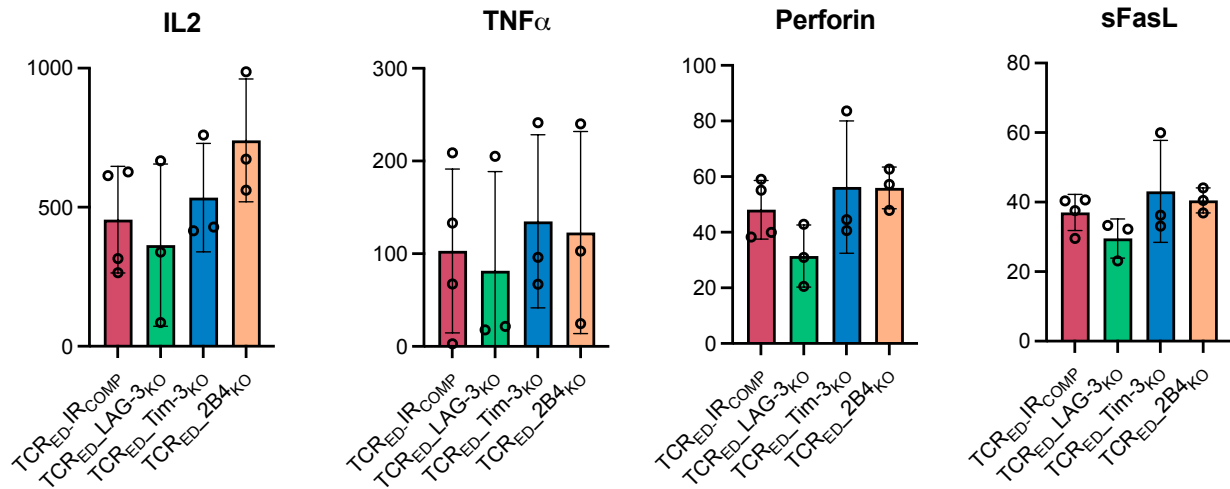

### Supplementary Figure 6. Similar cytokine secretion profile in TCR<sub>ED</sub>-IR<sub>KO</sub> and TCR<sub>ED</sub>-IR<sub>COMP</sub> T cells after chronic antigen stimulation

TCR<sub>ED</sub>-IR<sub>COMP</sub> and TCR<sub>ED</sub>-IR<sub>KO</sub> cells were daily stimulated with MM1.s A2<sup>POS</sup>ESO-1<sup>POS</sup> cells as described in Figure 4A. Quantification of IL-2, TNF $\alpha$ , perforin, and sFasL produced by TCR<sub>ED</sub>-IR<sub>COMP</sub> (red bars; N=4), TCR<sub>ED</sub>-LAG-3<sub>KO</sub> (green bars; N=3), TCR<sub>ED</sub>-TIM-3<sub>KO</sub> (blue bars; N=3), and TCR<sub>ED</sub>-2B4<sub>KO</sub> (light orange bars; N=3) upon exposure to HLA-A2<sup>POS</sup> NY-ESO<sup>POS</sup> MM1.s A2<sup>POS</sup>ESO-1<sup>POS</sup> cells is shown. Data were obtained from 3-4 biological replicates.

Supplementary Figure 7

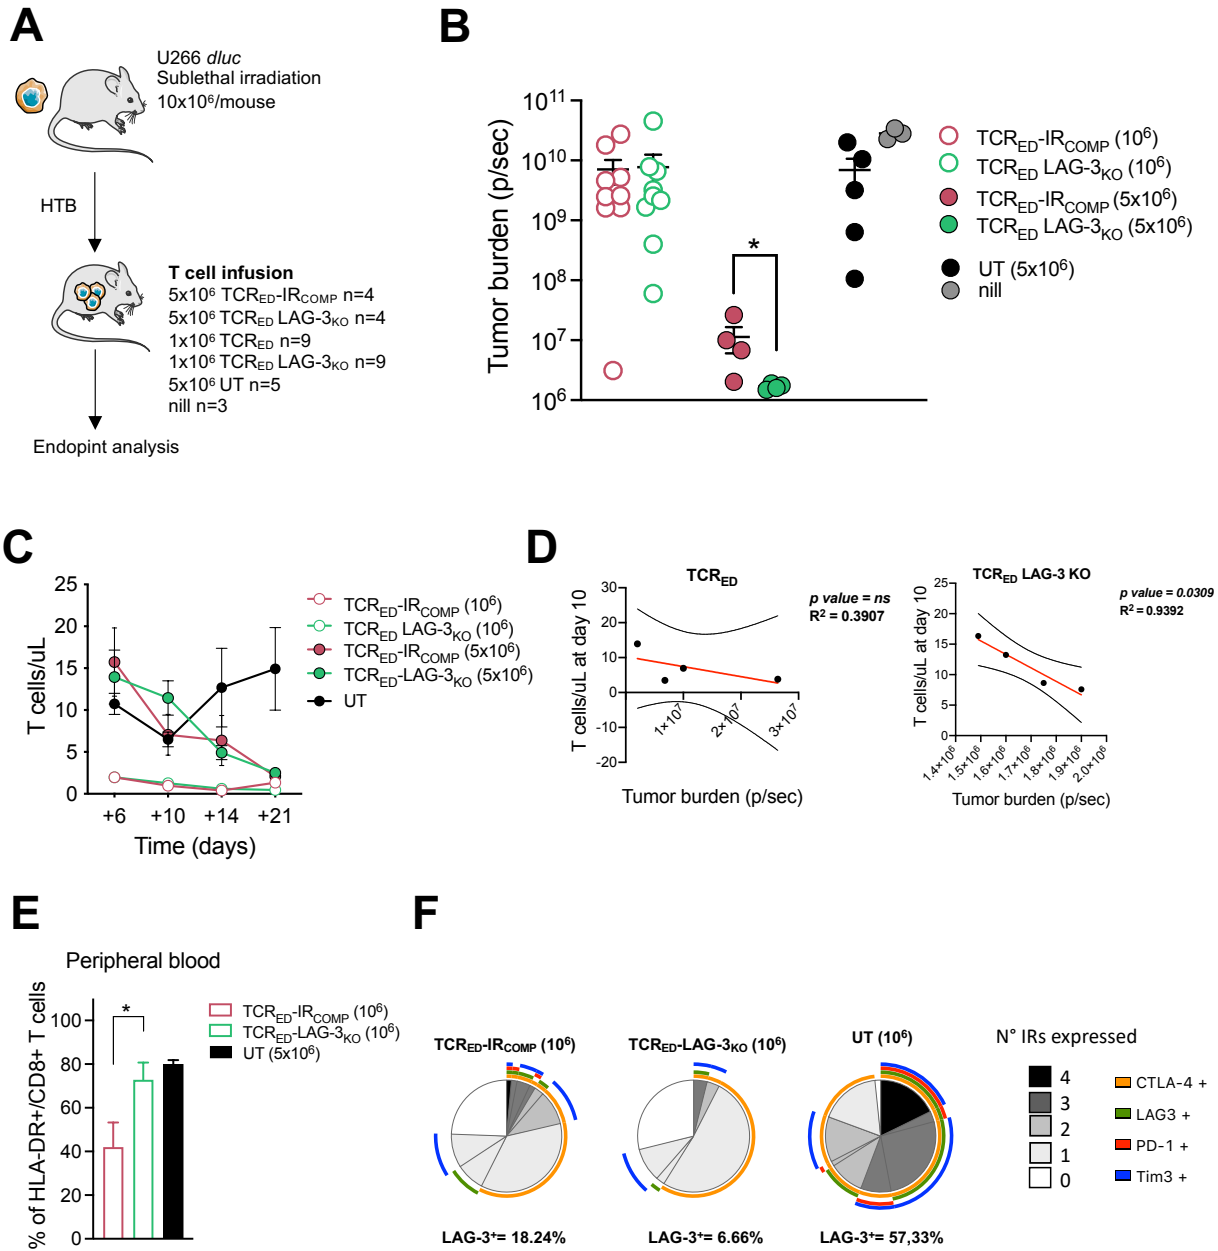



**Supplementary Figure 7. LAG-3<sub>KO</sub> cells prevents the up-regulation of IRs in TCR<sub>ED</sub> T cells *in vivo*.**

(A) Schematic representation of *in vivo* high tumor burden (HTB) multiple myeloma model (U266). Tumor burden measured by total body bioluminescence, BLI (B) and absolute numbers of circulating human T cells (C) in mice treated with a low dose (empty circles) or a high dose (filled circles) of TCR<sub>ED</sub>-IR<sub>COMP</sub> (red) or TCR<sub>ED</sub>-LAG-3<sub>KO</sub> (green) cells or injected with a high dose of unmanipulated cells (UT, black) or left untreated (nil, gray). (D) Linear regression analysis of tumor burden and number of circulating T cells in treated mice. (E) Frequencies of activated (HLA-DR<sup>+</sup>) T cells in the peripheral blood of mice treated with a low dose of TCR<sub>ED</sub>-IR<sub>COMP</sub> (red) or TCR<sub>ED</sub>-LAG-3<sub>KO</sub> (green) or UT cells (black). (F) Inhibitory receptors expression in T cells infiltrating the bone marrow of mice treated with low doses of TCR<sub>ED</sub>-IR<sub>COMP</sub> or TCR<sub>ED</sub>-LAG-3<sub>KO</sub> T cells or injected with UT cells. The slices in grayscale within the pie indicate the total number of co-expressed inhibitory receptors, while the external pie arches indicate the specific inhibitory receptor expressed. N. of treated and analyzed animals are shown in A.

### Supplementary Figure 8

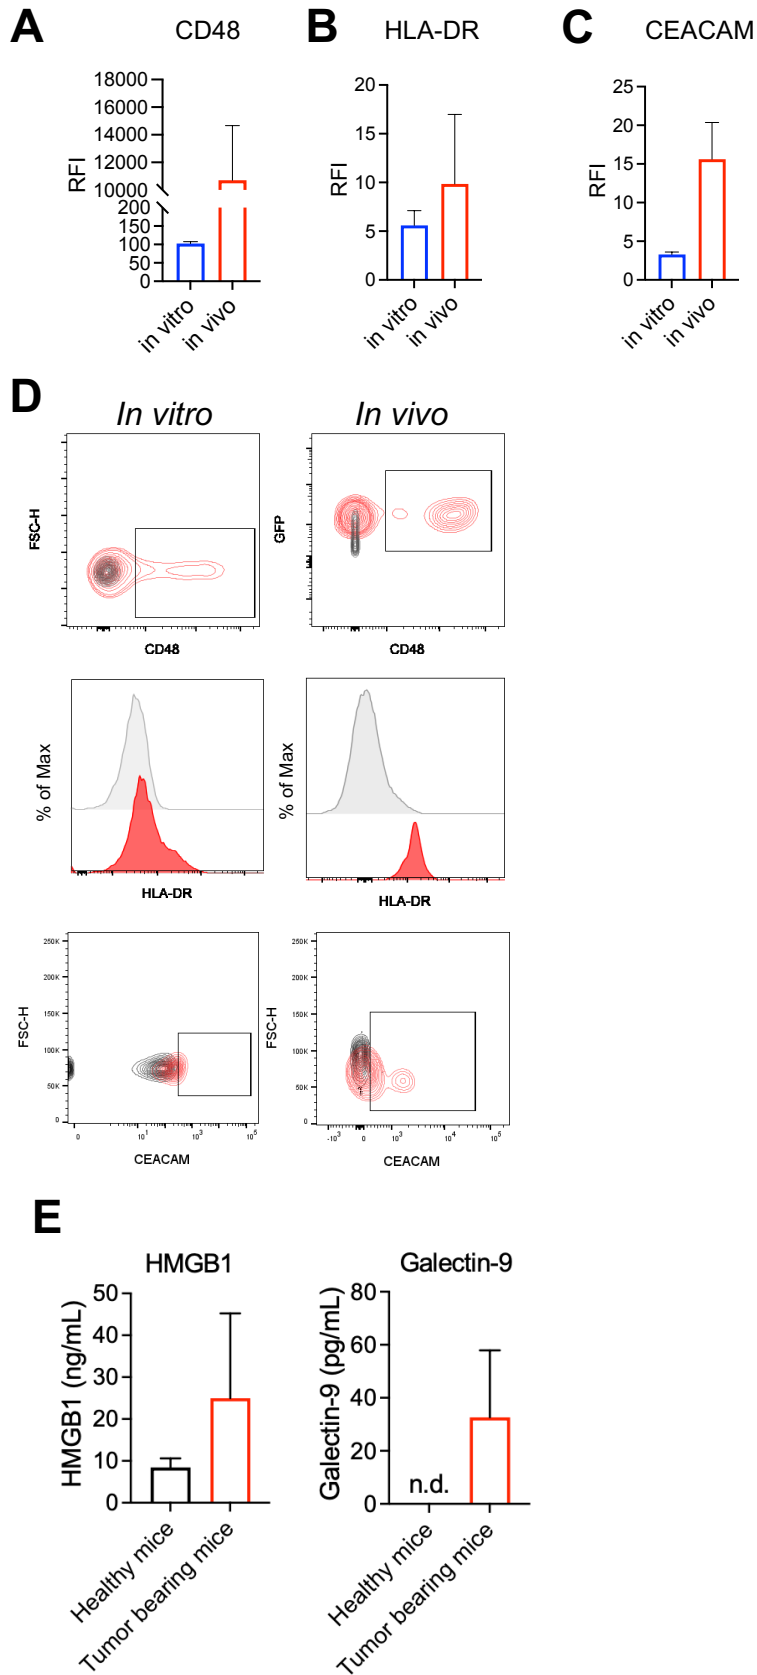

**Supplementary Figure 8. U266 cells upregulate IR ligands *in vivo*.**

Quantification of CD48 (A), HLA-DR (B) and CEACAM (C) expressed *in vitro* or *in vivo* on the cell surface of U266 cells (N=3). RFI (ratio of fluorescence intensity) = Mean of fluorescence intensity of stained cells / Mean of fluorescence intensity of unstained cells. (D) Representative plots of CD48, HLA-DR and CEACAM expression on U266 cells. Unstained samples are shown in grey while stained samples are shown in red. (E) Quantification of galectin-9 and HMGB1 in the serum of U266 injected mice (N=3) and healthy mice (N=2), at sacrifice.

### Supplementary Figure 9

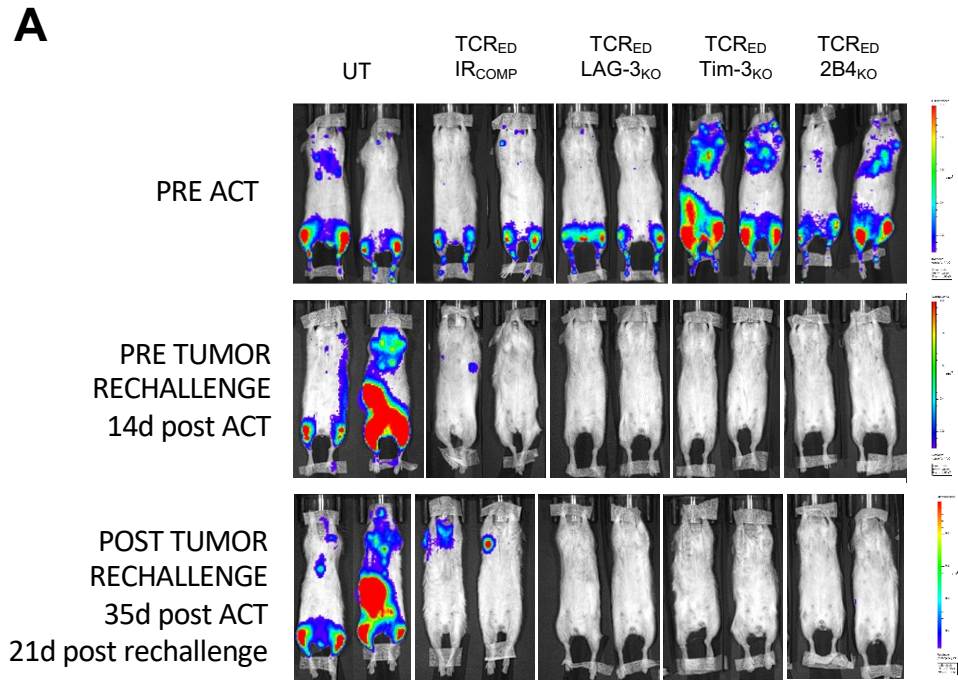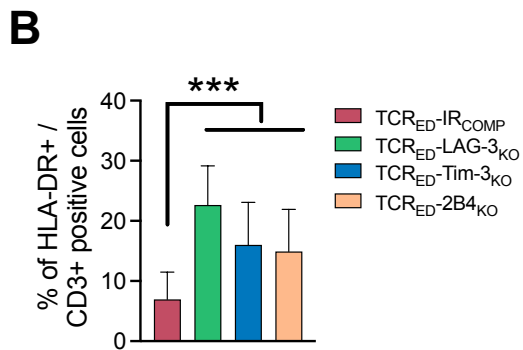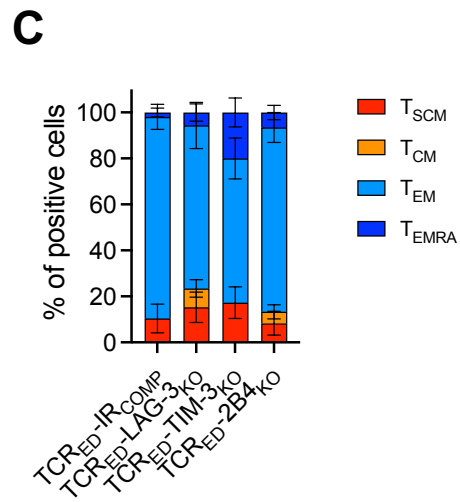

**Supplementary Figure 9. Activation and differentiation phenotypic profile of human T cells harvested in the rechallenge tumor model.**

**(A)** Bioluminescence images of representative mice injected with U266 cells according to **Figure 5A**. Mice were analysed before adoptive cell therapy with TCR<sub>ED</sub>-IR<sub>COMP</sub> and TCR<sub>ED</sub>-IR<sub>KO</sub> cells (upper panels), after adoptive cell therapy, but before rechallenge with U266 cells (middle panels) and after rechallenge with the tumor. **(B)** Frequencies of activated (HLA-DR<sup>+</sup>) CD3<sup>+</sup> T cells in the spleen at sacrifice after second tumor challenge. **(C)** Frequencies of stem memory T cells (T<sub>SCM</sub>), central memory (T<sub>CM</sub>), effector memory (T<sub>EM</sub>) and terminally differentiated effector cells (T<sub>EMRA</sub>) in human CD3<sup>+</sup> T cells in the spleen at sacrifice after second tumor challenge. Data are shown as mean ± SEM. N=6 for TCR<sub>ED</sub>-IR<sub>COMP</sub> (red), TCR<sub>ED</sub>-LAG-3<sub>KO</sub> (green), TCR<sub>ED</sub>-TIM-3<sub>KO</sub> (blue); N=5 TCR<sub>ED</sub>-2B4<sub>KO</sub> (light orange).
